# Supplementary material
Source: PubMed Central journal article supplement (PMC2525565)
Supplement: NIHMS60708-supplement-SI_pdfr.pdf [file NIHMS60708-supplement-SI_pdfr.pdf]

## Supporting Information for

### Interplay of Structure and Vibrational Dynamics in Six-coordinate Heme Nitrosyls

Nathan J. Silvernail, Alexander Barabanschikov, Jeffrey W. Pavlik, Bruce C. Noll, Jiyong

Zhao, E. Ercan Alp, Wolfgang Sturhahn, J. Timothy Sage, and W. Robert Scheidt\*

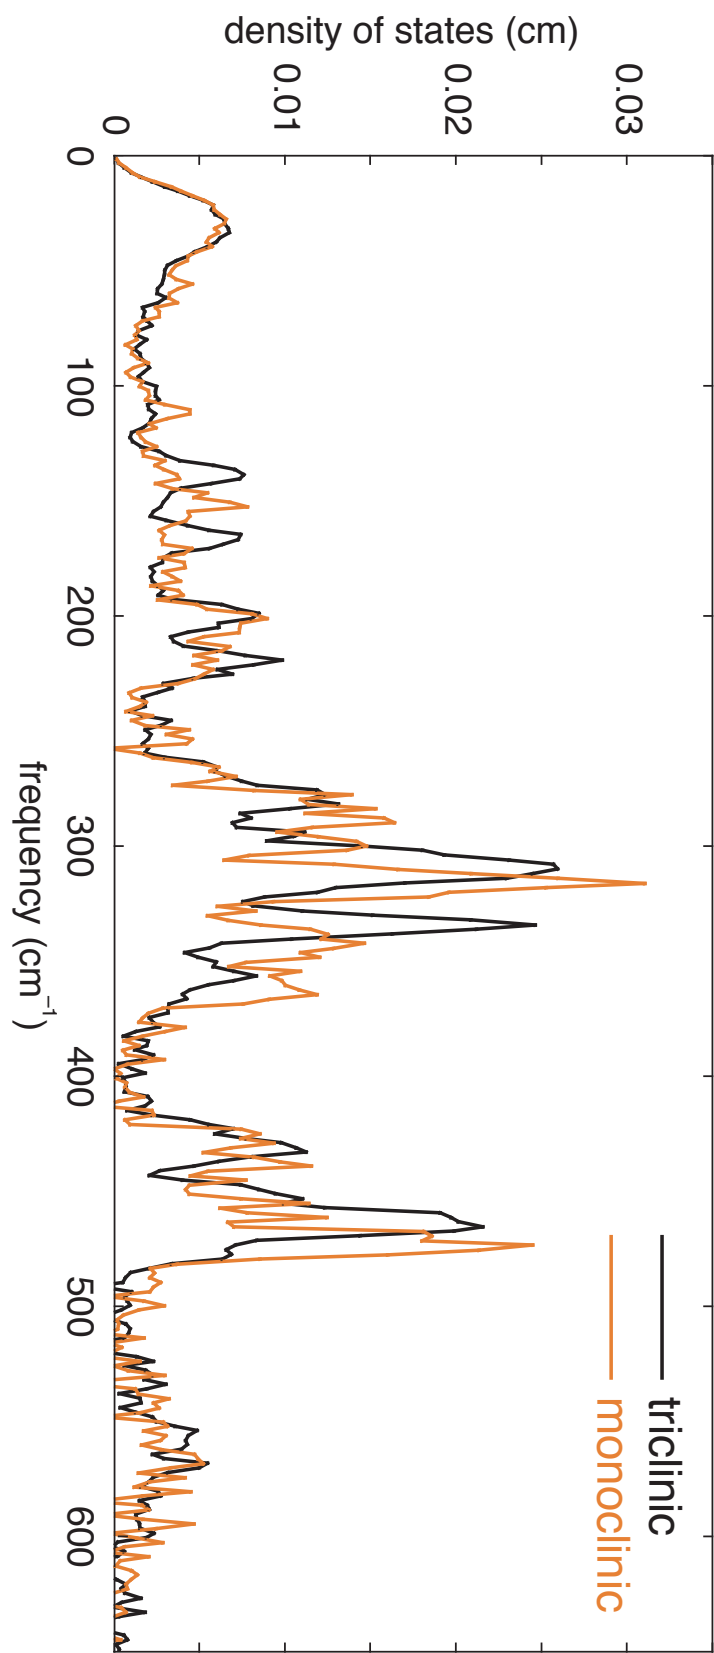

**Figure 1.** Comparison of the measured VDOS for powder samples of *mono*- and *tri*-[Fe(TpFPP)(1-MeIm)(NO)].

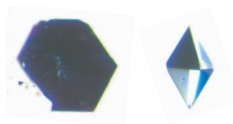

**Figure 2.** Illustration of the two crystalline forms of  $[\text{Fe}(\text{TpFPP})(1\text{-MeIm})(\text{NO})]$ . The triclinic form is on the right.

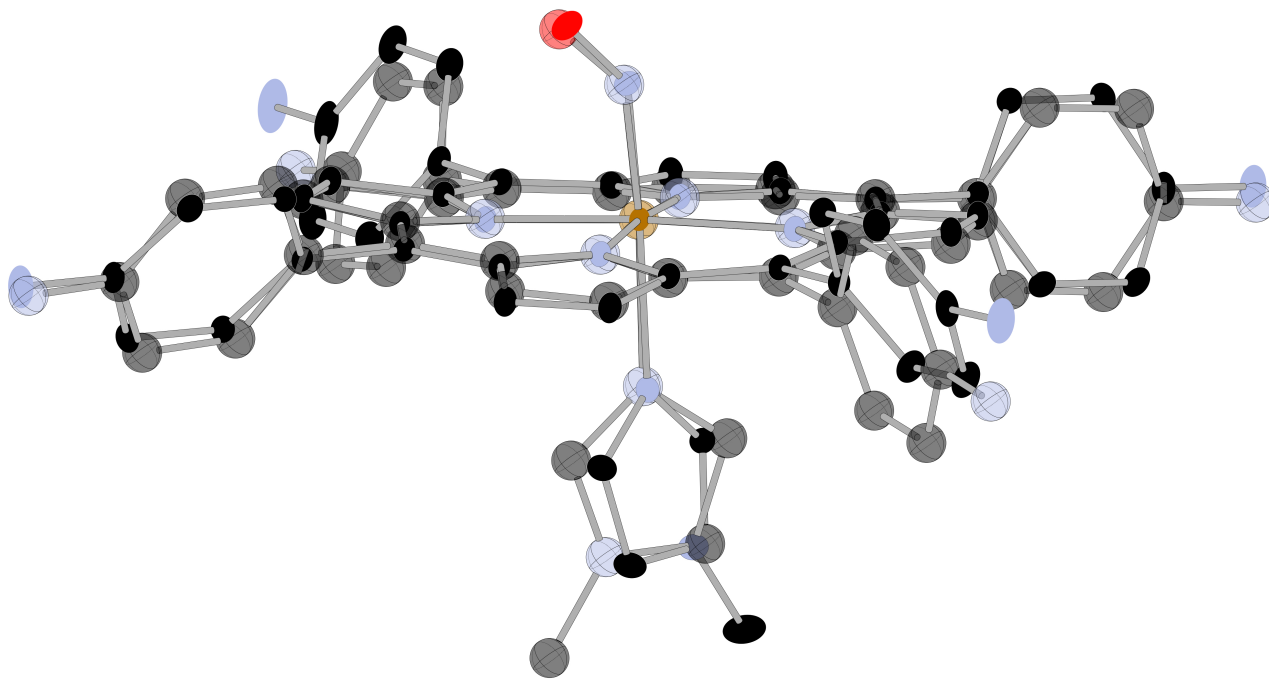

**Figure 3.** Diagram showing overlap of molecules of the two polymorphs. The two molecules are centered on the four porphyrin nitrogen atoms. The triclinic species is drawn with thermal ellipsoids contoured at the 50% probability level as solid surfaces, whereas atoms of the monoclinic form are drawn with translucent spheres of arbitrary radius. Atoms of the NO and the porphyrin core are seen to be close to overlap, whereas the imidazole and peripheral *p*-fluorophenyl groups are not.

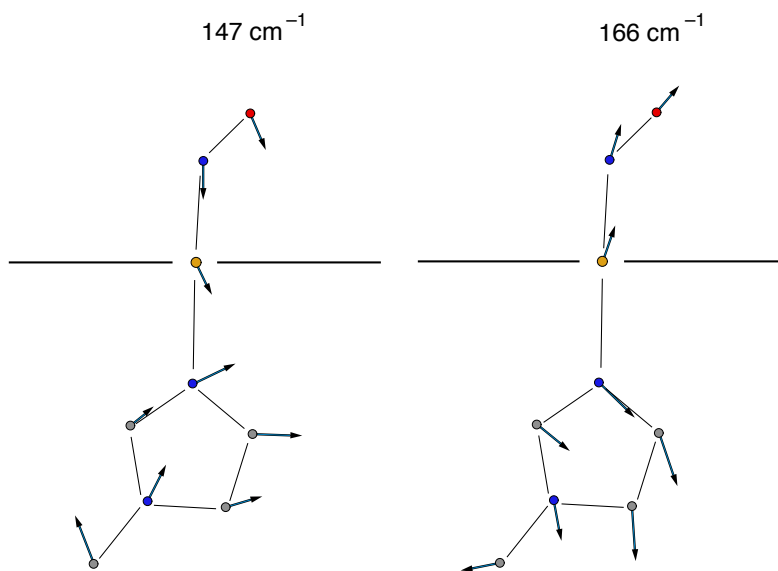

**Figure 4.** Predicted vibrational modes for  $tri\text{-}[\text{Fe}(\text{TpFPP})(1\text{-MeIm})(\text{NO})]$  with frequencies of  $147\text{ cm}^{-1}$  and  $166\text{ cm}^{-1}$ .

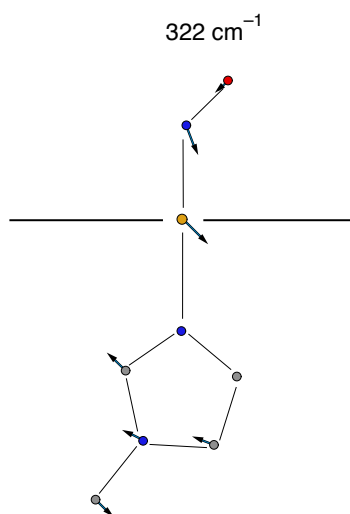

**Figure 5.** Predicted vibrational mode for the complex in-plane and out-of-plane motion of the FeNO group and the imidazole leading to changes in the Fe-N<sub>Im</sub> bond at  $322\text{ cm}^{-1}$ . The experimentally observed values are  $315\text{ cm}^{-1}$  in *mono*-[Fe(*Tp*FPP)(1-MeIm)(NO)] and  $310\text{ cm}^{-1}$  in *tri*-[Fe(*Tp*FPP)(1-MeIm)(NO)].

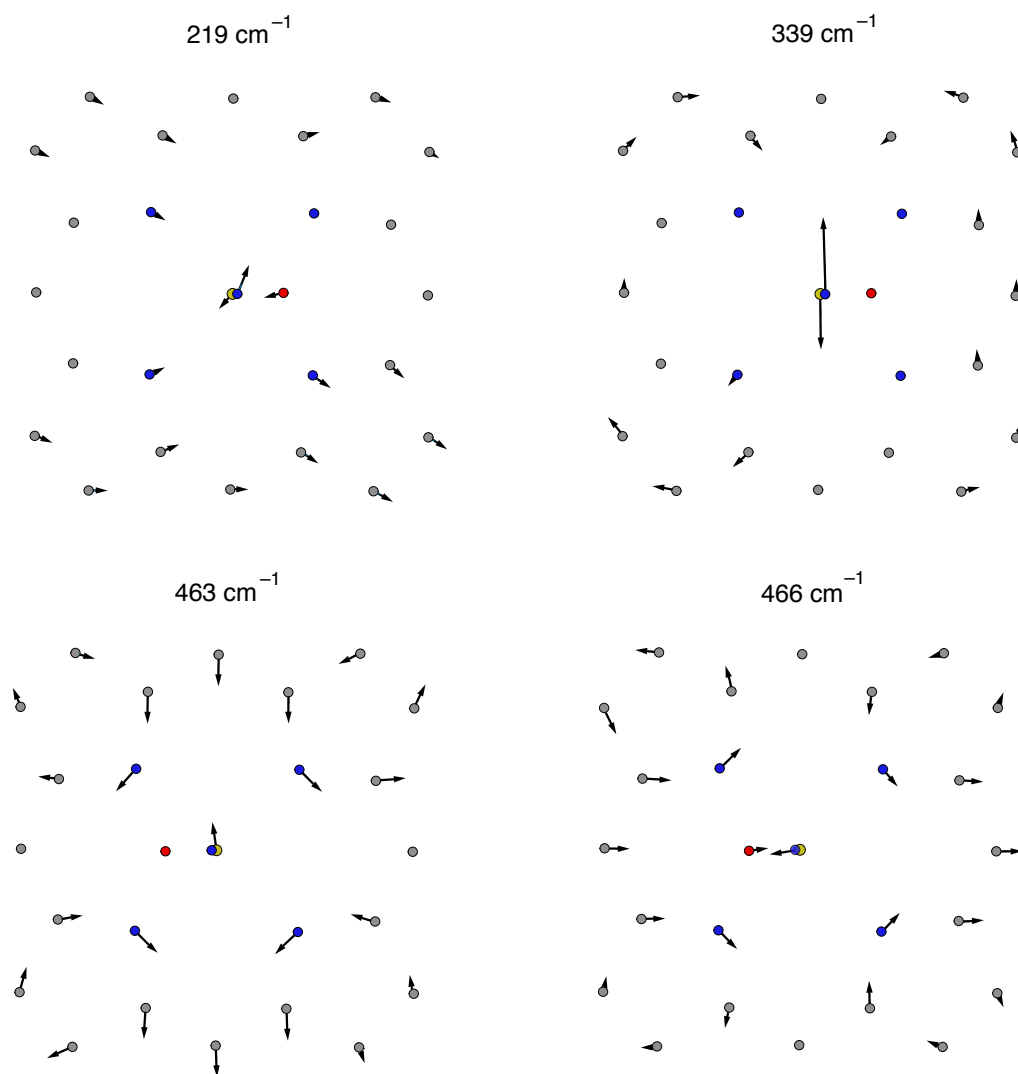

**Figure 6.** Predicted vibrational modes for the in-plane motion of the FeNO group. The imidazole group is omitted for clarity. The experimentally observed values that correspond to the calculated values in parentheses for *mono*-[Fe(TpFPP)(1-MeIm)(NO)] are 219 (219), 343 (339) and 456/471 (463/466)  $\text{cm}^{-1}$  and for *tri*-[Fe(TpFPP)(1-MeIm)(NO)] are 218 (219), 338 (339) and 457 (463/466)  $\text{cm}^{-1}$ .

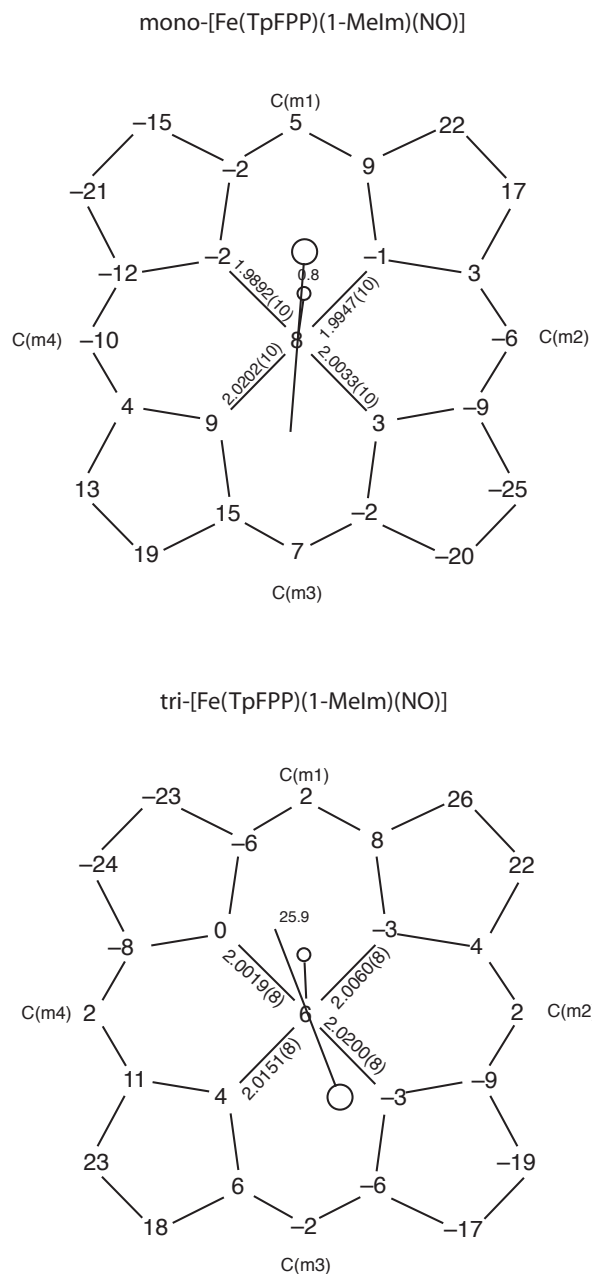

**Figure 7.** Formal diagram of the porphyrinato core of *mono*-[Fe(TpFPP)(1-Melm)(NO)] (top) and *tri*-[Fe(TpFPP)(1-Melm)(NO)] (bottom) both displaying the perpendicular displacements (in units of 0.01 Å) of the core atoms from the 24-atom mean plane. Positive displacements are toward the nitrosyl-coordinated face, while the imidazole ligand is displaced on the negative side of the porphyrin core. The orientation of the imidazole ligand with respect to the porphyrin core is also illustrated. The location of the 1-methyl group is represented by the large circle, while the location nitrosyl projection onto the porphyrin core is indicated by the small circle. Average bond distances (Å) and angles (degrees) are also displayed.

## Experimental Section

**General Information.** All reactions were carried out under anaerobic conditions. Chloroform (Fisher), 1-propanol (Acros) and 1-methylimidazole (Acros) were used as received. Nitric oxide (Mittler Specialty Gases) was purified by passing it through a trap containing 4 Å molecular sieves immersed in an ethanol/dry ice slurry.<sup>1</sup> Free base TpFPPyrin [H<sub>2</sub>TpFPP] was prepared according to Adler et al.<sup>2</sup> [Fe(TpFPP)(Cl)] was prepared according to the metalation procedure of Adler et al.<sup>3</sup> Infrared spectra were recorded on a Nicolet Nexus 870 FT-IR spectrometer. Solid state infrared samples were prepared by gently mulling a suitable crystal between two NaCl plates with a small amount of Nujol to allow dispersion. Samples were prepared for Mössbauer spectroscopy by weighing approximately 40 mg of selected crystals, grinding them in a small volume of Apiezon M grease to form a mull and placing them into a Mössbauer cup. Measurements were performed on a constant acceleration spectrometer from 15 K to 300 K.

**Synthesis of [Fe(TpFPP)(NO)(1-MeIm)].** [Fe(TpFPP)(NO)(1-MeIm)] was prepared using modifications of a previously reported synthesis.<sup>4</sup> Approximately 30 mg of [Fe(TpFPP)(Cl)] was placed into a 10 mL beaker along with 3 mL of chloroform and 3 mL of 1-methylimidazole. This beaker was then placed into a crystallization jar along with 0.5 mL of 1-propanol, 2 mL of chloroform and 3 mL of 1-methylimidazole, then subsequently sealed with a rubber stopper. The system was purged with Ar for 10 min and NO was bubbled through the inner and outer solutions for 10 min. Crystals were found after 3 weeks.

**X-Ray Crystallographic Studies.** Crystal data were collected and integrated using a Bruker Apex system, with graphite monochromated Mo-K $\alpha$  ( $\lambda$ = 0.71073 Å) radiation from 100–350 K (700 Series Oxford Cryostream). The program SADABS<sup>5</sup> was applied for absorption correction. All structures were solved using the Patterson method in SHELXS-97<sup>7</sup> and refined



using SHELXL-97.<sup>8</sup> All atoms were found after successive full-matrix least-squares refinement cycles on  $F^2$  and refined with anisotropic thermal parameters. Hydrogen atom positions were idealized with a riding model and fixed thermal parameters [ $U_{ij} = 1.2U_{ij}(\text{eq})$  or  $1.5U_{ij}(\text{eq})$ ] for the atom to which they are bonded. Complete crystallographic details are given in the below.

**Calculations.** DFT calculations provided the optimized structures and detailed vibrational predictions for the six-coordinate porphyrins *tri*-[Fe(TpFPP)(1-MeIm)(NO)] and *mono*-[Fe(TpFPP)(1-MeIm)(NO)]. DFT calculations were performed with Gaussian 03,<sup>9</sup> employing the B3LYP<sup>10</sup> hybrid functional. We used Ahlrich's VTZ<sup>11</sup> basis set for Fe atom and 6-31G\* basis set for all other atoms.

## References and Notes

- (1) Dodd, R. E.; Robinson, P. L. *Experimental Inorganic Chemistry*, Elsevier: New York, 1957, p 253.
- (2) Adler, A. D.; Longo, F. R.; Finarelli, J. D.; Goldmacher, J.; Assour, J.; Korsakoff, L. *J. Org. Chem.* **1967**, *32*, 476.
- (3) Adler, A. D.; Longo, F. R.; Kampus, F.; Kim, J. *J. Inorg. Nucl. Chem.* **1970**, *32*, 2443.
- (4) Wyllie, G. R. A.; Schulz, C. E.; Scheidt, W. R. *Inorg. Chem.* **2003**, *42*, 5722.
- (5) Sheldrick, G. M.: Program for empirical absorption correction of area detector data. Universität Göttingen, Germany, 1996.
- (6) Sheldrick, G. M. *Acta Crystallogr.* **1990**, *A46*, 467.
- (7) Patterson, A. L. *Phys. Rev.* **1934**, *46*, 372.
- (8) SHELXL-97: FORTRAN program for crystal structure refinement, © 1997, Sheldrick, G. M., Universität Göttingen, Germany.
- (9) Frisch, M. J.; Trucks, G. W.; Schlegel, H. B.; Scuseria, G. E.; Robb, M. A.; Cheeseman, J. R.; Montgomery, J. A., Jr.; Vreven, T.; Kudin, K. N.; Burant, J. C.; Millam, J. M.; Iyengar, S. S.; Tomasi, J.; Barone, V.; Mennucci, B.; Cossi, M.; Scalmani, G.; Rega, N.; Petersson, G. A.; Nakatsuji, H.; Hada, M.; Ehara, M.; Toyota, K.; Fukuda, R.; Hasegawa, J.; Ishida, M.; Nakajima, T.; Honda, Y.; Kitao, O.; Nakai, H.; Klene, M.; Li, X.; Knox, J. E.; Hratchian, H. P.; Cross, J. B.; Adamo, C.; Jaramillo, J.; Gomperts, R.; Stratmann, R. E.; Yazyev, O.; Austin, A. J.; Cammi, R.; Pomelli, C.; Ochterski, J. W.; Ayala, P. Y.; Morokuma, K.; Voth, G. A.; Salvador, P.; Dannenberg, J. J.; Zakrzewski, V. G.; Dapprich, S.; Daniels, A. D.; Strain, M. C.; Farkas, O.; Malick, D. K.; Rabuck, A. D.; Raghavachari, K.; Foresman, J. B.; Ortiz, J. V.; Cui, Q.; Baboul, A. G.; Clifford, S.; Cioslowski, J.; Stefanov, B. B.; Liu, G.; Liashenko, A.; Piskorz, P.; Komaromi, I.; Martin, R. L.; Fox, D. J.; Keith, T.; Al-Laham, M. A.; Peng, C. Y.; Nanayakkara, A.; Challacombe, M.; Gill, P. M. W.; Johnson, B.; Chen, W.; Wong, M. W.; Gonzalez, C.; Pople, J. A. *Gaussian 03: Revision C.02*; Gaussian, Inc.: Wallingford, CT, 2004.
- (10) Becke, A.D. *J. Chem. Phys.* **1993**, *98*, 5684. Lee, C.; Yang, W.; Parr, R.G. *Phys. Rev. B* **1988**, *37*, 785.
- (11) Schafer, A.; Horn, H.; Ahlrich, R. *J. Phys. Chem.* **1992**, *97*, 2571.

## Supporting Information

**Table S1.** Complete Crystallographic Details for *tri*-[Fe(TpFPP)(NO)(1-MeIm)]

|                                                              |                                                                   |
|--------------------------------------------------------------|-------------------------------------------------------------------|
| formula                                                      | C <sub>48</sub> H <sub>30</sub> F <sub>4</sub> FeN <sub>7</sub> O |
| FW, amu                                                      | 852.64                                                            |
| <i>a</i> , Å                                                 | 11.4205(2)                                                        |
| <i>b</i> , Å                                                 | 12.1603(2)                                                        |
| <i>c</i> , Å                                                 | 14.3296(2)                                                        |
| $\alpha$ , deg                                               | 92.7890(10)                                                       |
| $\beta$ , deg                                                | 102.6510(10)                                                      |
| $\gamma$ , deg                                               | 99.5850(10)                                                       |
| <i>V</i> , Å <sup>3</sup>                                    | 1907.12(5)                                                        |
| space group                                                  | <i>P</i> $\bar{1}$                                                |
| <i>Z</i>                                                     | 2                                                                 |
| D <sub>c</sub> , g/cm <sup>3</sup>                           | 1.485                                                             |
| F(000)                                                       | 874                                                               |
| $\mu$ , mm <sup>-1</sup>                                     | 0.465                                                             |
| crystal dimensions, mm                                       | 0.42 × 0.16 × 0.16                                                |
| radiation                                                    | MoK $\alpha$ , $\bar{\lambda}$ = 0.71073 Å                        |
| temperature, K                                               | 100(2)                                                            |
| diffractometer                                               | Bruker Apex CCD                                                   |
| $\theta$ range for collected data, deg                       | 1.46–33.14                                                        |
| index range                                                  | –17 ≤ <i>h</i> ≤ 17<br>–18 ≤ <i>k</i> ≤ 18<br>–22 ≤ <i>l</i> ≤ 22 |
| total data collected                                         | 86150                                                             |
| absorption correction                                        | Multiscan                                                         |
| relative transmission coefficients (I)                       | 0.9297 and 0.8296                                                 |
| unique data                                                  | 14421 ( <i>R</i> <sub>int</sub> = 0.033)                          |
| unique observed data [ <i>I</i> > 2 $\sigma$ ( <i>I</i> )]   | 12319                                                             |
| refinement method                                            | Full-matrix least-squares on <i>F</i> <sup>2</sup>                |
| data/restraints/parameters                                   | 14421/0/551                                                       |
| goodness-of-fit (pased on <i>F</i> <sup>2</sup> )            | 1.044                                                             |
| final <i>R</i> indices [ <i>I</i> > 2 $\sigma$ ( <i>I</i> )] | <i>R</i> <sub>1</sub> = 0.0346, <i>wR</i> <sub>2</sub> = 0.0936   |
| final <i>R</i> indices (all data)                            | <i>R</i> <sub>1</sub> = 0.0432, <i>wR</i> <sub>2</sub> = 0.0995   |

**Table S2.** Atomic Coordinates and Equivalent Isotropic Displacement Parameters ( $\text{\AA}^2$ ) for *tri*-[Fe(TpFPP)(NO)(1-MeIm)]<sup>a</sup>

| atom  | <i>x</i>    | <i>y</i>    | <i>z</i>    | <i>U</i> (eq) |
|-------|-------------|-------------|-------------|---------------|
| Fe(1) | 0.37887(1)  | 0.12126(1)  | 0.25232(1)  | 0.0116(1)     |
| N(1)  | 0.41016(8)  | 0.15916(7)  | 0.12453(6)  | 0.0132(1)     |
| N(2)  | 0.23966(8)  | -0.00058(7) | 0.18726(6)  | 0.0136(1)     |
| N(3)  | 0.33820(8)  | 0.09191(7)  | 0.38017(6)  | 0.0139(1)     |
| N(4)  | 0.51118(8)  | 0.25020(7)  | 0.31725(6)  | 0.0135(1)     |
| C(m1) | 0.25724(9)  | 0.01086(8)  | 0.01891(7)  | 0.0136(2)     |
| C(m2) | 0.16876(9)  | -0.06899(8) | 0.32883(7)  | 0.0152(2)     |
| C(m3) | 0.49306(9)  | 0.23845(8)  | 0.48549(7)  | 0.0143(2)     |
| C(m4) | 0.58108(9)  | 0.31928(8)  | 0.17611(7)  | 0.0142(2)     |
| C(a1) | 0.49346(9)  | 0.24676(8)  | 0.10693(7)  | 0.0142(2)     |
| C(a2) | 0.34838(9)  | 0.10678(8)  | 0.03581(7)  | 0.0140(2)     |
| C(a3) | 0.21061(9)  | -0.04032(8) | 0.09169(7)  | 0.0135(2)     |
| C(a4) | 0.17014(9)  | -0.07532(8) | 0.23132(7)  | 0.0143(2)     |
| C(a5) | 0.24704(9)  | 0.01148(8)  | 0.39719(7)  | 0.0152(2)     |
| C(a6) | 0.39474(9)  | 0.14884(8)  | 0.46803(7)  | 0.0149(2)     |
| C(a7) | 0.54820(9)  | 0.28262(8)  | 0.41398(7)  | 0.0142(2)     |
| C(a8) | 0.58968(9)  | 0.31766(8)  | 0.27481(7)  | 0.0140(2)     |
| C(b1) | 0.47994(10) | 0.25252(8)  | 0.00491(7)  | 0.0174(2)     |
| C(b2) | 0.39054(10) | 0.16581(8)  | -0.03893(7) | 0.0171(2)     |
| C(b3) | 0.12261(9)  | -0.14336(8) | 0.07636(7)  | 0.0159(2)     |
| C(b4) | 0.09718(9)  | -0.16446(8) | 0.16263(7)  | 0.0167(2)     |
| C(b5) | 0.24476(10) | 0.01977(9)  | 0.49774(7)  | 0.0193(2)     |
| C(b6) | 0.33663(10) | 0.10436(9)  | 0.54150(7)  | 0.0188(2)     |
| C(b7) | 0.65441(9)  | 0.37031(8)  | 0.43271(7)  | 0.0166(2)     |
| C(b8) | 0.68091(9)  | 0.39107(8)  | 0.34665(7)  | 0.0171(2)     |
| F(10) | 0.06846(7)  | -0.17639(7) | -0.36094(5) | 0.0314(2)     |
| C(11) | 0.20708(9)  | -0.03887(8) | -0.08199(7) | 0.0138(2)     |
| C(12) | 0.28440(9)  | -0.07000(8) | -0.13779(7) | 0.0157(2)     |
| C(13) | 0.23876(10) | -0.11560(9) | -0.23256(7) | 0.0182(2)     |
| C(14) | 0.11427(10) | -0.13133(9) | -0.26907(7) | 0.0193(2)     |
| C(15) | 0.03446(10) | -0.10236(9) | -0.21670(8) | 0.0193(2)     |
| C(16) | 0.08176(9)  | -0.05508(8) | -0.12296(7) | 0.0167(2)     |
| F(20) | -0.16311(9) | -0.38986(7) | 0.45370(6)  | 0.0390(2)     |
| C(21) | 0.08033(10) | -0.15501(8) | 0.36121(7)  | 0.0172(2)     |

**Table S2.** Continued

| atom  | $x$          | $y$          | $z$         | $U(\text{eq})$ |
|-------|--------------|--------------|-------------|----------------|
| C(22) | 0.12208(11)  | -0.23148(9)  | 0.42420(8)  | 0.0211(2)      |
| C(23) | 0.04035(12)  | -0.31227(9)  | 0.45502(8)  | 0.0253(2)      |
| C(24) | -0.08232(12) | -0.31354(10) | 0.42200(8)  | 0.0265(2)      |
| C(25) | -0.12797(11) | -0.24042(11) | 0.35922(9)  | 0.0271(2)      |
| C(26) | -0.04558(11) | -0.16073(10) | 0.32871(8)  | 0.0231(2)      |
| F(30) | 0.65379(8)   | 0.43566(7)   | 0.86469(5)  | 0.0321(2)      |
| C(31) | 0.53993(9)   | 0.29193(8)   | 0.58598(7)  | 0.0146(2)      |
| C(32) | 0.52427(10)  | 0.40082(9)   | 0.60886(7)  | 0.0191(2)      |
| C(33) | 0.56468(11)  | 0.45120(9)   | 0.70235(8)  | 0.0214(2)      |
| C(34) | 0.61875(11)  | 0.38961(9)   | 0.77249(7)  | 0.0206(2)      |
| C(35) | 0.63652(10)  | 0.28229(9)   | 0.75326(7)  | 0.0200(2)      |
| C(36) | 0.59698(10)  | 0.23378(8)   | 0.65902(7)  | 0.0175(2)      |
| F(40) | 0.92729(7)   | 0.62129(6)   | 0.04747(5)  | 0.0295(2)      |
| C(41) | 0.67278(9)   | 0.40065(8)   | 0.14233(7)  | 0.0155(2)      |
| C(42) | 0.67883(11)  | 0.51607(9)   | 0.15696(8)  | 0.0218(2)      |
| C(43) | 0.76489(12)  | 0.59115(9)   | 0.12512(9)  | 0.0249(2)      |
| C(44) | 0.84285(10)  | 0.54852(9)   | 0.07864(7)  | 0.0207(2)      |
| C(45) | 0.83972(10)  | 0.43549(9)   | 0.06150(8)  | 0.0207(2)      |
| C(46) | 0.75387(10)  | 0.36150(9)   | 0.09430(8)  | 0.0193(2)      |
| N(5)  | 0.47556(8)   | 0.02285(7)   | 0.25752(6)  | 0.0160(2)      |
| O(1)  | 0.49211(8)   | -0.05039(7)  | 0.20746(6)  | 0.0225(2)      |
| N(6)  | 0.25766(8)   | 0.24222(7)   | 0.23532(6)  | 0.0151(1)      |
| N(7)  | 0.15344(9)   | 0.37146(8)   | 0.26668(7)  | 0.0210(2)      |
| C(1)  | 0.22398(10)  | 0.29820(9)   | 0.30361(7)  | 0.0180(2)      |
| C(2)  | 0.14186(11)  | 0.36243(10)  | 0.16936(8)  | 0.0231(2)      |
| C(3)  | 0.20612(10)  | 0.28270(9)   | 0.15055(7)  | 0.0202(2)      |
| C(4)  | 0.10199(16)  | 0.44965(14)  | 0.31907(10) | 0.0376(3)      |

<sup>a</sup>  $U(\text{eq})$  is defined as one third of the trace of the orthogonalized  $\mathbf{U}_{ij}$  tensor. The estimated standard deviations of the least significant digits are given in parentheses.

**Table S3.** Bond Lengths for *tri*-[Fe(TpFPP)(NO)(1-MeIm)]<sup>a</sup>

| bond        | length (Å) | bond        | length (Å) |
|-------------|------------|-------------|------------|
| Fe(1)–N(5)  | 1.7521(9)  | C(13)–H(13) | 0.9500     |
| Fe(1)–N(1)  | 2.0019(8)  | C(14)–C(15) | 1.3780(15) |
| Fe(1)–N(2)  | 2.0060(8)  | C(15)–C(16) | 1.3894(14) |
| Fe(1)–N(4)  | 2.0151(8)  | C(15)–H(15) | 0.9500     |
| Fe(1)–N(3)  | 2.0200(8)  | C(16)–H(16) | 0.9500     |
| Fe(1)–N(6)  | 2.1689(9)  | F(20)–C(24) | 1.3633(13) |
| N(1)–C(a1)  | 1.3774(12) | C(21)–C(22) | 1.3955(15) |
| N(1)–C(a2)  | 1.3778(12) | C(21)–C(26) | 1.3999(16) |
| N(2)–C(a4)  | 1.3748(12) | C(22)–C(23) | 1.3961(15) |
| N(2)–C(a3)  | 1.3792(12) | C(22)–H(22) | 0.9500     |
| N(3)–C(a6)  | 1.3752(12) | C(23)–C(24) | 1.374(2)   |
| N(3)–C(a5)  | 1.3766(12) | C(23)–H(23) | 0.9500     |
| N(4)–C(a8)  | 1.3744(12) | C(24)–C(25) | 1.378(2)   |
| N(4)–C(a7)  | 1.3748(12) | C(25)–C(26) | 1.3904(16) |
| C(m1)–C(a3) | 1.3982(13) | C(25)–H(25) | 0.9500     |
| C(m1)–C(a2) | 1.4002(13) | C(26)–H(26) | 0.9500     |
| C(m1)–C(11) | 1.4903(13) | F(30)–C(34) | 1.3568(12) |
| C(m2)–C(a5) | 1.3958(13) | C(31)–C(36) | 1.3952(14) |
| C(m2)–C(a4) | 1.3992(13) | C(31)–C(32) | 1.3982(14) |
| C(m2)–C(21) | 1.4934(13) | C(32)–C(33) | 1.3922(14) |
| C(m3)–C(a6) | 1.3977(13) | C(32)–H(32) | 0.9500     |
| C(m3)–C(a7) | 1.3995(13) | C(33)–C(34) | 1.3812(16) |
| C(m3)–C(31) | 1.4961(13) | C(33)–H(33) | 0.9500     |
| C(m4)–C(a1) | 1.3958(13) | C(34)–C(35) | 1.3777(16) |
| C(m4)–C(a8) | 1.3973(13) | C(35)–C(36) | 1.3937(14) |
| C(m4)–C(41) | 1.4946(13) | C(35)–H(35) | 0.9500     |
| C(a1)–C(b1) | 1.4424(13) | C(36)–H(36) | 0.9500     |
| C(a2)–C(b2) | 1.4421(13) | F(40)–C(44) | 1.3621(12) |
| C(a3)–C(b3) | 1.4441(13) | C(41)–C(42) | 1.3970(14) |
| C(a4)–C(b4) | 1.4402(13) | C(41)–C(46) | 1.3972(15) |
| C(a5)–C(b5) | 1.4457(14) | C(42)–C(43) | 1.3950(15) |
| C(a6)–C(b6) | 1.4434(14) | C(42)–H(42) | 0.9500     |
| C(a7)–C(b7) | 1.4419(13) | C(43)–C(44) | 1.3729(17) |
| C(a8)–C(b8) | 1.4399(13) | C(43)–H(43) | 0.9500     |

**Table S3.** Continued

| bond        | length (Å) | bond        | length (Å) |
|-------------|------------|-------------|------------|
| C(b1)–C(b2) | 1.3583(14) | C(44)–C(45) | 1.3776(16) |
| C(b1)–H(b1) | 0.9500     | C(45)–C(46) | 1.3931(14) |
| C(b2)–H(b2) | 0.9500     | C(45)–H(45) | 0.9500     |
| C(b3)–C(b4) | 1.3570(14) | C(46)–H(46) | 0.9500     |
| C(b3)–H(b3) | 0.9500     | N(5)–O(1)   | 1.1819(12) |
| C(b4)–H(b4) | 0.9500     | N(6)–C(1)   | 1.3252(13) |
| C(b5)–C(b6) | 1.3571(14) | N(6)–C(3)   | 1.3805(13) |
| C(b5)–H(b5) | 0.9500     | N(7)–C(1)   | 1.3494(14) |
| C(b6)–H(b6) | 0.9500     | N(7)–C(2)   | 1.3689(14) |
| C(b7)–C(b8) | 1.3581(14) | N(7)–C(4)   | 1.4570(15) |
| C(b7)–H(b7) | 0.9500     | C(1)–H(1a)  | 0.9500     |
| C(b8)–H(b8) | 0.9500     | C(2)–C(3)   | 1.3599(16) |
| F(10)–C(14) | 1.3564(12) | C(2)–H(2a)  | 0.9500     |
| C(11)–C(12) | 1.3977(14) | C(3)–H(3a)  | 0.9500     |
| C(11)–C(16) | 1.3995(14) | C(4)–H(4a)  | 0.9800     |
| C(12)–C(13) | 1.3942(14) | C(4)–H(4b)  | 0.9800     |
| C(12)–H(12) | 0.9500     | C(4)–H(4C)  | 0.9800     |
| C(13)–C(14) | 1.3804(15) |             |            |

<sup>a</sup>The estimated standard deviations of the least significant digits are given in parentheses.

**Table S4.** Bond Angles for *tri*-[Fe(TpFPP)(NO)(1-MeIm)]<sup>a</sup>

| angle             | degree    | angle             | degree     |
|-------------------|-----------|-------------------|------------|
| N(5)–Fe(1)–N(1)   | 89.64(4)  | C(13)–C(12)–H(12) | 119.4      |
| N(5)–Fe(1)–N(2)   | 88.27(4)  | C(11)–C(12)–H(12) | 119.4      |
| N(1)–Fe(1)–N(2)   | 90.13(3)  | C(14)–C(13)–C(12) | 117.90(9)  |
| N(5)–Fe(1)–N(4)   | 95.31(4)  | C(14)–C(13)–H(13) | 121.1      |
| N(1)–Fe(1)–N(4)   | 89.97(3)  | C(12)–C(13)–H(13) | 121.1      |
| N(2)–Fe(1)–N(4)   | 176.42(3) | F(10)–C(14)–C(15) | 118.46(10) |
| N(5)–Fe(1)–N(3)   | 94.92(4)  | F(10)–C(14)–C(13) | 118.56(10) |
| N(1)–Fe(1)–N(3)   | 175.43(3) | C(15)–C(14)–C(13) | 122.98(9)  |
| N(2)–Fe(1)–N(3)   | 89.87(3)  | C(14)–C(15)–C(16) | 118.35(10) |
| N(4)–Fe(1)–N(3)   | 89.73(3)  | C(14)–C(15)–H(15) | 120.8      |
| N(5)–Fe(1)–N(6)   | 176.08(4) | C(16)–C(15)–H(15) | 120.8      |
| N(1)–Fe(1)–N(6)   | 86.72(3)  | C(15)–C(16)–C(11) | 120.97(9)  |
| N(2)–Fe(1)–N(6)   | 90.29(3)  | C(15)–C(16)–H(16) | 119.5      |
| N(4)–Fe(1)–N(6)   | 86.14(3)  | C(11)–C(16)–H(16) | 119.5      |
| N(3)–Fe(1)–N(6)   | 88.71(3)  | C(22)–C(21)–C(26) | 118.88(10) |
| C(a1)–N(1)–C(a2)  | 105.87(8) | C(22)–C(21)–C(m2) | 120.41(10) |
| C(a1)–N(1)–Fe(1)  | 126.97(6) | C(26)–C(21)–C(m2) | 120.71(10) |
| C(a2)–N(1)–Fe(1)  | 127.07(6) | C(21)–C(22)–C(23) | 120.96(11) |
| C(a4)–N(2)–C(a3)  | 105.73(8) | C(21)–C(22)–H(22) | 119.5      |
| C(a4)–N(2)–Fe(1)  | 126.64(6) | C(23)–C(22)–H(22) | 119.5      |
| C(a3)–N(2)–Fe(1)  | 126.49(6) | C(24)–C(23)–C(22) | 117.94(11) |
| C(a6)–N(3)–C(a5)  | 105.72(8) | C(24)–C(23)–H(23) | 121.0      |
| C(a6)–N(3)–Fe(1)  | 127.22(6) | C(22)–C(23)–H(23) | 121.0      |
| C(a5)–N(3)–Fe(1)  | 127.05(6) | F(20)–C(24)–C(23) | 118.57(12) |
| C(a8)–N(4)–C(a7)  | 105.87(8) | F(20)–C(24)–C(25) | 118.17(12) |
| C(a8)–N(4)–Fe(1)  | 126.89(6) | C(23)–C(24)–C(25) | 123.25(10) |
| C(a7)–N(4)–Fe(1)  | 127.03(6) | C(24)–C(25)–C(26) | 118.22(12) |
| C(a3)–C(m1)–C(a2) | 123.41(9) | C(24)–C(25)–H(25) | 120.9      |
| C(a3)–C(m1)–C(11) | 118.38(8) | C(26)–C(25)–H(25) | 120.9      |
| C(a2)–C(m1)–C(11) | 118.22(8) | C(25)–C(26)–C(21) | 120.75(11) |
| C(a5)–C(m2)–C(a4) | 123.60(9) | C(25)–C(26)–H(26) | 119.6      |
| C(a5)–C(m2)–C(21) | 118.61(9) | C(21)–C(26)–H(26) | 119.6      |
| C(a4)–C(m2)–C(21) | 117.78(8) | C(36)–C(31)–C(32) | 118.68(9)  |
| C(a6)–C(m3)–C(a7) | 123.75(9) | C(36)–C(31)–C(m3) | 121.05(9)  |



**Table S4.** Continued

| angle             | degree    | angle             | degree     |
|-------------------|-----------|-------------------|------------|
| C(a6)–C(m3)–C(31) | 118.05(8) | C(32)–C(31)–C(m3) | 120.24(9)  |
| C(a7)–C(m3)–C(31) | 118.18(8) | C(33)–C(32)–C(31) | 121.18(10) |
| C(a1)–C(m4)–C(a8) | 123.66(9) | C(33)–C(32)–H(32) | 119.4      |
| C(a1)–C(m4)–C(41) | 117.82(8) | C(31)–C(32)–H(32) | 119.4      |
| C(a8)–C(m4)–C(41) | 118.49(8) | C(34)–C(33)–C(32) | 118.02(10) |
| N(1)–C(a1)–C(m4)  | 126.08(9) | C(34)–C(33)–H(33) | 121.0      |
| N(1)–C(a1)–C(b1)  | 110.18(8) | C(32)–C(33)–H(33) | 121.0      |
| C(m4)–C(a1)–C(b1) | 123.73(9) | F(30)–C(34)–C(35) | 118.39(10) |
| N(1)–C(a2)–C(m1)  | 125.89(8) | F(30)–C(34)–C(33) | 118.76(10) |
| N(1)–C(a2)–C(b2)  | 110.01(8) | C(35)–C(34)–C(33) | 122.83(10) |
| C(m1)–C(a2)–C(b2) | 124.10(9) | C(34)–C(35)–C(36) | 118.33(10) |
| N(2)–C(a3)–C(m1)  | 125.83(8) | C(34)–C(35)–H(35) | 120.8      |
| N(2)–C(a3)–C(b3)  | 110.08(8) | C(36)–C(35)–H(35) | 120.8      |
| C(m1)–C(a3)–C(b3) | 124.09(8) | C(35)–C(36)–C(31) | 120.95(9)  |
| N(2)–C(a4)–C(m2)  | 126.23(8) | C(35)–C(36)–H(36) | 119.5      |
| N(2)–C(a4)–C(b4)  | 110.38(8) | C(31)–C(36)–H(36) | 119.5      |
| C(m2)–C(a4)–C(b4) | 123.39(9) | C(42)–C(41)–C(46) | 118.78(9)  |
| N(3)–C(a5)–C(m2)  | 125.77(9) | C(42)–C(41)–C(m4) | 121.34(9)  |
| N(3)–C(a5)–C(b5)  | 110.30(8) | C(46)–C(41)–C(m4) | 119.88(9)  |
| C(m2)–C(a5)–C(b5) | 123.92(9) | C(43)–C(42)–C(41) | 120.78(11) |
| N(3)–C(a6)–C(m3)  | 125.91(9) | C(43)–C(42)–H(42) | 119.6      |
| N(3)–C(a6)–C(b6)  | 110.30(8) | C(41)–C(42)–H(42) | 119.6      |
| C(m3)–C(a6)–C(b6) | 123.77(9) | C(44)–C(43)–C(42) | 118.22(10) |
| N(4)–C(a7)–C(m3)  | 126.12(9) | C(44)–C(43)–H(43) | 120.9      |
| N(4)–C(a7)–C(b7)  | 110.07(8) | C(42)–C(43)–H(43) | 120.9      |
| C(m3)–C(a7)–C(b7) | 123.81(9) | F(40)–C(44)–C(43) | 118.58(10) |
| N(4)–C(a8)–C(m4)  | 125.68(8) | F(40)–C(44)–C(45) | 118.17(10) |
| N(4)–C(a8)–C(b8)  | 110.30(8) | C(43)–C(44)–C(45) | 123.24(10) |
| C(m4)–C(a8)–C(b8) | 123.97(9) | C(44)–C(45)–C(46) | 117.91(10) |
| C(b2)–C(b1)–C(a1) | 106.79(8) | C(44)–C(45)–H(45) | 121.0      |
| C(b2)–C(b1)–H(b1) | 126.6     | C(46)–C(45)–H(45) | 121.0      |
| C(a1)–C(b1)–H(b1) | 126.6     | C(45)–C(46)–C(41) | 121.07(10) |
| C(b1)–C(b2)–C(a2) | 107.08(8) | C(45)–C(46)–H(46) | 119.5      |
| C(b1)–C(b2)–H(b2) | 126.5     | C(41)–C(46)–H(46) | 119.5      |

**Table S4.** Continued

| angle             | degree    | angle            | degree     |
|-------------------|-----------|------------------|------------|
| C(a2)–C(b2)–H(b2) | 126.5     | O(1)–N(5)–Fe(1)  | 138.64(8)  |
| C(b4)–C(b3)–C(a3) | 106.88(8) | C(1)–N(6)–C(3)   | 105.48(9)  |
| C(b4)–C(b3)–H(b3) | 126.6     | C(1)–N(6)–Fe(1)  | 127.77(7)  |
| C(a3)–C(b3)–H(b3) | 126.6     | C(3)–N(6)–Fe(1)  | 126.61(7)  |
| C(b3)–C(b4)–C(a4) | 106.93(8) | C(1)–N(7)–C(2)   | 107.25(9)  |
| C(b3)–C(b4)–H(b4) | 126.5     | C(1)–N(7)–C(4)   | 127.41(10) |
| C(a4)–C(b4)–H(b4) | 126.5     | C(2)–N(7)–C(4)   | 125.30(10) |
| C(b6)–C(b5)–C(a5) | 106.70(9) | N(6)–C(1)–N(7)   | 111.32(9)  |
| C(b6)–C(b5)–H(b5) | 126.7     | N(6)–C(1)–H(1a)  | 124.3      |
| C(a5)–C(b5)–H(b5) | 126.7     | N(7)–C(1)–H(1a)  | 124.3      |
| C(b5)–C(b6)–C(a6) | 106.96(9) | C(3)–C(2)–N(7)   | 106.43(9)  |
| C(b5)–C(b6)–H(b6) | 126.5     | C(3)–C(2)–H(2a)  | 126.8      |
| C(a6)–C(b6)–H(b6) | 126.5     | N(7)–C(2)–H(2a)  | 126.8      |
| C(b8)–C(b7)–C(a7) | 106.96(8) | C(2)–C(3)–N(6)   | 109.52(9)  |
| C(b8)–C(b7)–H(b7) | 126.5     | C(2)–C(3)–H(3a)  | 125.2      |
| C(a7)–C(b7)–H(b7) | 126.5     | N(6)–C(3)–H(3a)  | 125.2      |
| C(b7)–C(b8)–C(a8) | 106.75(9) | N(7)–C(4)–H(4a)  | 109.5      |
| C(b7)–C(b8)–H(b8) | 126.6     | N(7)–C(4)–H(4b)  | 109.5      |
| C(a8)–C(b8)–H(b8) | 126.6     | H(4a)–C(4)–H(4b) | 109.5      |
| C(12)–C(11)–C(16) | 118.60(9) | N(7)–C(4)–H(4C)  | 109.5      |
| C(12)–C(11)–C(m1) | 120.63(9) | H(4a)–C(4)–H(4C) | 109.5      |
| C(16)–C(11)–C(m1) | 120.77(9) | H(4b)–C(4)–H(4C) | 109.5      |
| C(13)–C(12)–C(11) | 121.19(9) |                  |            |

<sup>a</sup>The estimated standard deviations of the least significant digits are given in parentheses.

**Table S5.** Anisotropic Displacement Parameters ( $\text{\AA}^2$ ) for *tri*-[Fe(TpFPP)(NO)(1-MeIm)]<sup>a</sup>

| atom  | $U_{11}$  | $U_{22}$  | $U_{33}$  | $U_{23}$   | $U_{13}$  | $U_{12}$   |
|-------|-----------|-----------|-----------|------------|-----------|------------|
| Fe(1) | 0.0122(1) | 0.0110(1) | 0.0116(1) | 0.0004(1)  | 0.0040(1) | 0.0003(1)  |
| N(1)  | 0.0140(3) | 0.0124(3) | 0.0128(3) | 0.0000(3)  | 0.0043(3) | -0.0002(3) |
| N(2)  | 0.0148(3) | 0.0131(3) | 0.0126(3) | 0.0001(3)  | 0.0050(3) | 0.0000(3)  |
| N(3)  | 0.0146(3) | 0.0139(3) | 0.0128(3) | 0.0005(3)  | 0.0042(3) | 0.0002(3)  |
| N(4)  | 0.0146(3) | 0.0129(3) | 0.0124(3) | 0.0006(3)  | 0.0037(3) | 0.0002(3)  |
| C(M1) | 0.0141(4) | 0.0135(4) | 0.0130(4) | -0.0007(3) | 0.0043(3) | 0.0009(3)  |
| C(M2) | 0.0152(4) | 0.0150(4) | 0.0156(4) | 0.0012(3)  | 0.0061(3) | -0.0003(3) |
| C(M3) | 0.0161(4) | 0.0139(4) | 0.0124(4) | 0.0006(3)  | 0.0031(3) | 0.0015(3)  |
| C(M4) | 0.0148(4) | 0.0132(4) | 0.0148(4) | 0.0012(3)  | 0.0055(3) | 0.0000(3)  |
| C(A1) | 0.0154(4) | 0.0132(4) | 0.0140(4) | 0.0009(3)  | 0.0055(3) | 0.0000(3)  |
| C(A2) | 0.0152(4) | 0.0138(4) | 0.0129(4) | 0.0003(3)  | 0.0047(3) | 0.0005(3)  |
| C(A3) | 0.0138(4) | 0.0130(4) | 0.0133(4) | -0.0006(3) | 0.0042(3) | 0.0003(3)  |
| C(A4) | 0.0146(4) | 0.0132(4) | 0.0149(4) | 0.0007(3)  | 0.0052(3) | 0.0002(3)  |
| C(A5) | 0.0159(4) | 0.0154(4) | 0.0144(4) | 0.0009(3)  | 0.0059(3) | 0.0002(3)  |
| C(A6) | 0.0170(4) | 0.0152(4) | 0.0124(4) | 0.0007(3)  | 0.0047(3) | 0.0011(3)  |
| C(A7) | 0.0153(4) | 0.0133(4) | 0.0131(4) | 0.0006(3)  | 0.0029(3) | 0.0006(3)  |
| C(A8) | 0.0142(4) | 0.0130(4) | 0.0144(4) | 0.0004(3)  | 0.0042(3) | 0.0001(3)  |
| C(B1) | 0.0201(4) | 0.0167(4) | 0.0142(4) | 0.0016(3)  | 0.0056(3) | -0.0027(3) |
| C(B2) | 0.0202(4) | 0.0168(4) | 0.0131(4) | 0.0005(3)  | 0.0045(3) | -0.0015(3) |
| C(B3) | 0.0170(4) | 0.0140(4) | 0.0154(4) | -0.0013(3) | 0.0049(3) | -0.0015(3) |
| C(B4) | 0.0177(4) | 0.0145(4) | 0.0171(4) | 0.0006(3)  | 0.0058(3) | -0.0017(3) |
| C(B5) | 0.0212(5) | 0.0211(4) | 0.0148(4) | 0.0000(3)  | 0.0081(4) | -0.0028(4) |
| C(B6) | 0.0218(5) | 0.0202(4) | 0.0136(4) | 0.0000(3)  | 0.0069(3) | -0.0018(4) |
| C(B7) | 0.0172(4) | 0.0160(4) | 0.0143(4) | 0.0004(3)  | 0.0020(3) | -0.0015(3) |
| C(B8) | 0.0164(4) | 0.0165(4) | 0.0161(4) | 0.0003(3)  | 0.0033(3) | -0.0026(3) |
| F(10) | 0.0323(4) | 0.0398(4) | 0.0164(3) | -0.0099(3) | 0.0012(3) | -0.0002(3) |
| C(11) | 0.0147(4) | 0.0126(4) | 0.0136(4) | -0.0002(3) | 0.0042(3) | 0.0004(3)  |
| C(12) | 0.0153(4) | 0.0162(4) | 0.0153(4) | -0.0007(3) | 0.0044(3) | 0.0018(3)  |
| C(13) | 0.0204(4) | 0.0186(4) | 0.0164(4) | -0.0018(3) | 0.0070(4) | 0.0030(3)  |
| C(14) | 0.0222(5) | 0.0196(4) | 0.0133(4) | -0.0027(3) | 0.0023(3) | -0.0001(4) |
| C(15) | 0.0162(4) | 0.0211(4) | 0.0179(4) | -0.0011(3) | 0.0015(3) | 0.0002(3)  |
| C(16) | 0.0155(4) | 0.0181(4) | 0.0164(4) | 0.0000(3)  | 0.0048(3) | 0.0022(3)  |
| F(20) | 0.0439(5) | 0.0366(4) | 0.0290(4) | -0.0004(3) | 0.0160(4) | -0.0232(4) |
| C(21) | 0.0189(4) | 0.0168(4) | 0.0153(4) | -0.0008(3) | 0.0076(3) | -0.0024(3) |

**Table S5.** Continued

| atom  | $U_{11}$  | $U_{22}$  | $U_{33}$  | $U_{23}$   | $U_{13}$  | $U_{12}$   |
|-------|-----------|-----------|-----------|------------|-----------|------------|
| C(22) | 0.0253(5) | 0.0197(4) | 0.0178(4) | 0.0019(3)  | 0.0082(4) | -0.0016(4) |
| C(23) | 0.0361(6) | 0.0195(5) | 0.0186(4) | 0.0015(4)  | 0.0104(4) | -0.0051(4) |
| C(24) | 0.0332(6) | 0.0231(5) | 0.0198(5) | -0.0040(4) | 0.0137(4) | -0.0133(4) |
| C(25) | 0.0220(5) | 0.0301(6) | 0.0270(5) | -0.0023(4) | 0.0105(4) | -0.0070(4) |
| C(26) | 0.0201(5) | 0.0237(5) | 0.0252(5) | 0.0022(4)  | 0.0088(4) | -0.0018(4) |
| F(30) | 0.0448(5) | 0.0303(4) | 0.0152(3) | -0.0053(3) | 0.0021(3) | -0.0018(3) |
| C(31) | 0.0165(4) | 0.0143(4) | 0.0127(4) | 0.0008(3)  | 0.0039(3) | 0.0011(3)  |
| C(32) | 0.0256(5) | 0.0164(4) | 0.0159(4) | 0.0020(3)  | 0.0049(4) | 0.0055(4)  |
| C(33) | 0.0297(5) | 0.0162(4) | 0.0184(4) | -0.0008(3) | 0.0068(4) | 0.0038(4)  |
| C(34) | 0.0240(5) | 0.0216(5) | 0.0136(4) | -0.0017(3) | 0.0036(4) | -0.0012(4) |
| C(35) | 0.0222(5) | 0.0209(4) | 0.0147(4) | 0.0023(3)  | 0.0009(4) | 0.0020(4)  |
| C(36) | 0.0202(4) | 0.0158(4) | 0.0162(4) | 0.0018(3)  | 0.0038(3) | 0.0029(3)  |
| F(40) | 0.0314(4) | 0.0287(4) | 0.0241(3) | 0.0007(3)  | 0.0121(3) | -0.0141(3) |
| C(41) | 0.0159(4) | 0.0154(4) | 0.0139(4) | 0.0012(3)  | 0.0041(3) | -0.0016(3) |
| C(42) | 0.0259(5) | 0.0160(4) | 0.0250(5) | 0.0016(4)  | 0.0120(4) | -0.0002(4) |
| C(43) | 0.0323(6) | 0.0164(4) | 0.0257(5) | 0.0011(4)  | 0.0120(5) | -0.0039(4) |
| C(44) | 0.0208(5) | 0.0225(5) | 0.0149(4) | 0.0024(3)  | 0.0046(4) | -0.0081(4) |
| C(45) | 0.0178(4) | 0.0242(5) | 0.0198(4) | 0.0022(4)  | 0.0074(4) | -0.0012(4) |
| C(46) | 0.0198(4) | 0.0177(4) | 0.0209(4) | 0.0023(3)  | 0.0078(4) | 0.0001(3)  |
| N(5)  | 0.0159(4) | 0.0148(3) | 0.0182(4) | 0.0031(3)  | 0.0064(3) | 0.0020(3)  |
| O(1)  | 0.0249(4) | 0.0173(3) | 0.0288(4) | 0.0006(3)  | 0.0124(3) | 0.0056(3)  |
| N(6)  | 0.0148(3) | 0.0157(3) | 0.0142(3) | 0.0003(3)  | 0.0035(3) | 0.0015(3)  |
| N(7)  | 0.0249(4) | 0.0235(4) | 0.0166(4) | -0.0005(3) | 0.0047(3) | 0.0108(3)  |
| C(1)  | 0.0207(4) | 0.0186(4) | 0.0147(4) | -0.0001(3) | 0.0032(3) | 0.0055(3)  |
| C(2)  | 0.0271(5) | 0.0284(5) | 0.0166(4) | 0.0035(4)  | 0.0045(4) | 0.0132(4)  |
| C(3)  | 0.0230(5) | 0.0248(5) | 0.0144(4) | 0.0018(3)  | 0.0044(4) | 0.0091(4)  |
| C(4)  | 0.0524(9) | 0.0432(8) | 0.0251(6) | -0.0017(5) | 0.0101(6) | 0.0314(7)  |

<sup>a</sup>The estimated standard deviations of the least significant digits are given in parentheses. The anisotropic displacement factor exponent takes the form:  $-2 \pi [h^2 U_{11} + \dots + 2 h k a^* b^* U_{12}]$ .

**Table S6.** Hydrogen Atom Coordinates and Equivalent Isotropic Displacement Parameters ( $\text{\AA}^2$ ) for *tri*-[Fe(TpFPP)(NO)(1-MeIm)]<sup>a</sup>

| atom  | <i>x</i> | <i>y</i> | <i>z</i> | <i>U</i> (eq) |
|-------|----------|----------|----------|---------------|
| H(B1) | 0.5249   | 0.3065   | -0.0257  | 0.021         |
| H(B2) | 0.3613   | 0.1475   | -0.1062  | 0.021         |
| H(B3) | 0.0890   | -0.1879  | 0.0172   | 0.019         |
| H(B4) | 0.0418   | -0.2262  | 0.1753   | 0.020         |
| H(B5) | 0.1896   | -0.0253  | 0.5274   | 0.023         |
| H(B6) | 0.3585   | 0.1295   | 0.6079   | 0.023         |
| H(B7) | 0.6976   | 0.4066   | 0.4937   | 0.020         |
| H(B8) | 0.7469   | 0.4438   | 0.3359   | 0.020         |
| H(12) | 0.3696   | -0.0599  | -0.1107  | 0.019         |
| H(13) | 0.2917   | -0.1352  | -0.2708  | 0.022         |
| H(15) | -0.0508  | -0.1144  | -0.2440  | 0.023         |
| H(16) | 0.0283   | -0.0334  | -0.0861  | 0.020         |
| H(22) | 0.2074   | -0.2285  | 0.4464   | 0.025         |
| H(23) | 0.0687   | -0.3647  | 0.4975   | 0.030         |
| H(25) | -0.2134  | -0.2443  | 0.3374   | 0.033         |
| H(26) | -0.0751  | -0.1096  | 0.2853   | 0.028         |
| H(32) | 0.4854   | 0.4411   | 0.5597   | 0.023         |
| H(33) | 0.5553   | 0.5257   | 0.7175   | 0.026         |
| H(35) | 0.6748   | 0.2423   | 0.8030   | 0.024         |
| H(36) | 0.6091   | 0.1601   | 0.6443   | 0.021         |
| H(42) | 0.6237   | 0.5438   | 0.1890   | 0.026         |
| H(43) | 0.7694   | 0.6697   | 0.1353   | 0.030         |
| H(45) | 0.8944   | 0.4088   | 0.0284   | 0.025         |
| H(46) | 0.7504   | 0.2832   | 0.0838   | 0.023         |
| H(1A) | 0.2466   | 0.2881   | 0.3700   | 0.022         |
| H(2A) | 0.0977   | 0.4037   | 0.1239   | 0.028         |
| H(3A) | 0.2143   | 0.2586   | 0.0886   | 0.024         |
| H(4A) | 0.1143   | 0.4333   | 0.3865   | 0.056         |
| H(4B) | 0.0144   | 0.4419   | 0.2907   | 0.056         |
| H(4C) | 0.1426   | 0.5264   | 0.3153   | 0.056         |

## Supporting Information

**Table S7.** Complete Crystallographic Details for *mono-mono*-[Fe(TpFPP)(NO)(1-MeIm)]

|                                                              |                                                                   |
|--------------------------------------------------------------|-------------------------------------------------------------------|
| formula                                                      | C <sub>48</sub> H <sub>30</sub> F <sub>4</sub> FeN <sub>7</sub> O |
| FW, amu                                                      | 852.64                                                            |
| <i>a</i> , Å                                                 | 14.1135(4)                                                        |
| <i>b</i> , Å                                                 | 18.7149(6)                                                        |
| <i>c</i> , Å                                                 | 14.8501(4)                                                        |
| $\beta$ , deg                                                | 97.8247(10)                                                       |
| <i>V</i> , Å <sup>3</sup>                                    | 3885.9(2)                                                         |
| space group                                                  | P 2 <sub>1</sub> /n                                               |
| <i>Z</i>                                                     | 4                                                                 |
| D <sub>c</sub> , g/cm <sup>3</sup>                           | 1.457                                                             |
| F(000)                                                       | 1748                                                              |
| $\mu$ , mm <sup>-1</sup>                                     | 0.457                                                             |
| crystal dimensions, mm                                       | 0.54 × 0.27 × 0.11                                                |
| radiation                                                    | MoK $\alpha$ , $\bar{\lambda}$ = 0.71073 Å                        |
| temperature, K                                               | 100(2)                                                            |
| diffractometer                                               | Bruker Apex CCD                                                   |
| $\theta$ range for collected data, deg                       | 1.76–32.03                                                        |
| index range                                                  | –21 ≤ <i>h</i> ≤ 21<br>–23 ≤ <i>k</i> ≤ 27<br>–22 ≤ <i>l</i> ≤ 22 |
| total data collected                                         | 110943                                                            |
| absorption correction                                        | Semi-empirical fromequiv                                          |
| relative transmission coefficients (I)                       | 0.9511 and 0.7915                                                 |
| unique data                                                  | 13516 ( <i>R</i> <sub>int</sub> = 0.040)                          |
| unique observed data [ <i>I</i> > 2 $\sigma$ ( <i>I</i> )]   | 10958                                                             |
| refinement method                                            | Full-matrix least-squares on F <sup>2</sup>                       |
| data/restraints/parameters                                   | 13516/0/551                                                       |
| goodness-of-fit (pased on <i>F</i> <sup>2</sup> )            | 1.040                                                             |
| final <i>R</i> indices [ <i>I</i> > 2 $\sigma$ ( <i>I</i> )] | <i>R</i> <sub>1</sub> = 0.0383, <i>wR</i> <sub>2</sub> = 0.0983   |
| final <i>R</i> indices (all data)                            | <i>R</i> <sub>1</sub> = 0.0520, <i>wR</i> <sub>2</sub> = 0.1077   |

**Table S8.** Atomic Coordinates and Equivalent Isotropic Displacement Parameters ( $\text{\AA}^2$ ) for *mono*-[Fe(TpFPP)(NO)(1-MeIm)]<sup>a</sup>

| atom  | <i>x</i>    | <i>y</i>   | <i>z</i>    | <i>U</i> (eq) |
|-------|-------------|------------|-------------|---------------|
| Fe(1) | 0.68933(1)  | 0.11124(1) | 0.72332(1)  | 0.0104(1)     |
| N(1)  | 0.63273(7)  | 0.11743(5) | 0.59335(7)  | 0.0124(2)     |
| N(2)  | 0.55910(7)  | 0.11927(5) | 0.76037(7)  | 0.0122(2)     |
| N(3)  | 0.74854(7)  | 0.11375(5) | 0.85378(7)  | 0.0125(2)     |
| N(4)  | 0.82182(7)  | 0.10820(5) | 0.68633(7)  | 0.0126(2)     |
| C(m1) | 0.46165(8)  | 0.11691(6) | 0.61027(8)  | 0.0130(2)     |
| C(m2) | 0.60246(8)  | 0.12186(6) | 0.92650(8)  | 0.0133(2)     |
| C(m3) | 0.91974(8)  | 0.10797(6) | 0.83632(8)  | 0.0135(2)     |
| C(m4) | 0.77953(9)  | 0.11818(6) | 0.52087(8)  | 0.0139(2)     |
| C(a1) | 0.68098(9)  | 0.12140(6) | 0.51948(8)  | 0.0135(2)     |
| C(a2) | 0.53741(8)  | 0.11925(6) | 0.55936(8)  | 0.0131(2)     |
| C(a3) | 0.47341(8)  | 0.11500(6) | 0.70470(8)  | 0.0133(2)     |
| C(a4) | 0.53719(8)  | 0.11804(6) | 0.84745(8)  | 0.0131(2)     |
| C(a5) | 0.70115(8)  | 0.12129(6) | 0.92776(8)  | 0.0133(2)     |
| C(a6) | 0.84399(8)  | 0.11474(6) | 0.88709(8)  | 0.0135(2)     |
| C(a7) | 0.90754(8)  | 0.10328(6) | 0.74195(8)  | 0.0131(2)     |
| C(a8) | 0.84430(9)  | 0.11000(6) | 0.59946(8)  | 0.0137(2)     |
| C(b1) | 0.61441(9)  | 0.12727(7) | 0.43735(8)  | 0.0163(2)     |
| C(b2) | 0.52578(9)  | 0.12575(7) | 0.46196(8)  | 0.0159(2)     |
| C(b3) | 0.39614(9)  | 0.10980(7) | 0.75834(8)  | 0.0161(2)     |
| C(b4) | 0.43559(9)  | 0.11217(7) | 0.84662(8)  | 0.0159(2)     |
| C(b5) | 0.76849(9)  | 0.12873(7) | 1.00943(8)  | 0.0164(2)     |
| C(b6) | 0.85672(9)  | 0.12441(7) | 0.98398(8)  | 0.0165(2)     |
| C(b7) | 0.98513(9)  | 0.09929(7) | 0.68862(8)  | 0.0166(2)     |
| C(b8) | 0.94591(9)  | 0.10326(7) | 0.60015(8)  | 0.0165(2)     |
| F(10) | 0.09319(6)  | 0.13315(6) | 0.41664(7)  | 0.0332(2)     |
| C(11) | 0.36280(9)  | 0.11969(7) | 0.56020(8)  | 0.0146(2)     |
| C(12) | 0.32701(9)  | 0.06471(7) | 0.50254(9)  | 0.0169(2)     |
| C(13) | 0.23602(9)  | 0.06870(7) | 0.45372(9)  | 0.0192(2)     |
| C(14) | 0.18222(9)  | 0.12849(8) | 0.46407(10) | 0.0222(3)     |
| C(15) | 0.21497(11) | 0.18412(9) | 0.51998(12) | 0.0344(4)     |
| C(16) | 0.30616(11) | 0.17926(8) | 0.56822(11) | 0.0286(3)     |
| F(20) | 0.47922(6)  | 0.16166(5) | 1.26474(5)  | 0.0226(2)     |
| C(21) | 0.56492(8)  | 0.12944(7) | 1.01485(8)  | 0.0139(2)     |

**Table S8.** Continued

| atom  | <i>x</i>    | <i>y</i>    | <i>z</i>    | <i>U</i> (eq) |
|-------|-------------|-------------|-------------|---------------|
| C(22) | 0.52183(9)  | 0.19324(7)  | 1.03505(8)  | 0.0158(2)     |
| C(23) | 0.49166(9)  | 0.20424(7)  | 1.11908(8)  | 0.0176(2)     |
| C(24) | 0.50541(9)  | 0.14987(7)  | 1.18185(8)  | 0.0170(2)     |
| C(25) | 0.54466(10) | 0.08494(8)  | 1.16418(9)  | 0.0211(2)     |
| C(26) | 0.57463(10) | 0.07519(7)  | 1.07975(9)  | 0.0199(2)     |
| F(30) | 1.29183(6)  | 0.12808(6)  | 1.02178(7)  | 0.0312(2)     |
| C(31) | 1.01899(8)  | 0.11199(7)  | 0.88578(8)  | 0.0139(2)     |
| C(32) | 1.07507(9)  | 0.05162(7)  | 0.90460(10) | 0.0207(2)     |
| C(33) | 1.16753(10) | 0.05675(8)  | 0.95044(11) | 0.0244(3)     |
| C(34) | 1.20188(9)  | 0.12295(8)  | 0.97709(9)  | 0.0210(3)     |
| C(35) | 1.14845(10) | 0.18399(8)  | 0.96166(11) | 0.0267(3)     |
| C(36) | 1.05656(10) | 0.17802(8)  | 0.91511(11) | 0.0240(3)     |
| F(40) | 0.91244(7)  | 0.15106(6)  | 0.18520(6)  | 0.0296(2)     |
| C(41) | 0.81714(9)  | 0.12525(7)  | 0.43219(8)  | 0.0155(2)     |
| C(42) | 0.84860(10) | 0.19118(8)  | 0.40601(9)  | 0.0212(2)     |
| C(43) | 0.88127(11) | 0.20026(8)  | 0.32282(9)  | 0.0244(3)     |
| C(44) | 0.88129(9)  | 0.14205(8)  | 0.26711(9)  | 0.0212(3)     |
| C(45) | 0.85058(14) | 0.07598(9)  | 0.28960(11) | 0.0346(4)     |
| C(46) | 0.81835(14) | 0.06787(9)  | 0.37323(11) | 0.0324(4)     |
| N(5)  | 0.67088(8)  | 0.01887(6)  | 0.71898(7)  | 0.0149(2)     |
| O(1)  | 0.60694(7)  | -0.02067(5) | 0.69600(7)  | 0.0226(2)     |
| N(6)  | 0.69902(7)  | 0.22488(6)  | 0.72480(7)  | 0.0136(2)     |
| N(7)  | 0.66909(8)  | 0.34015(6)  | 0.70978(8)  | 0.0175(2)     |
| C(1)  | 0.63309(9)  | 0.27352(7)  | 0.69922(9)  | 0.0176(2)     |
| C(2)  | 0.76347(9)  | 0.33367(7)  | 0.74450(10) | 0.0207(2)     |
| C(3)  | 0.78109(9)  | 0.26256(7)  | 0.75326(10) | 0.0199(2)     |
| C(4)  | 0.61902(11) | 0.40746(7)  | 0.69059(11) | 0.0257(3)     |

<sup>a</sup> *U*(eq) is defined as one third of the trace of the orthogonalized  $\mathbf{U}_{ij}$  tensor. The estimated standard deviations of the least significant digits are given in parentheses.



**Table S9.** Bond Lengths for *mono*-[Fe(TpFPP)(NO)(1-MeIm)]<sup>a</sup>

| bond        | length (Å) | bond        | length (Å) |
|-------------|------------|-------------|------------|
| Fe(1)–N(5)  | 1.7481(11) | C(13)–H(13) | 0.9500     |
| Fe(1)–N(1)  | 1.9892(10) | C(14)–C(15) | 1.372(2)   |
| Fe(1)–N(2)  | 1.9947(10) | C(15)–C(16) | 1.388(2)   |
| Fe(1)–N(3)  | 2.0033(10) | C(15)–H(15) | 0.9500     |
| Fe(1)–N(4)  | 2.0202(10) | C(16)–H(16) | 0.9500     |
| Fe(1)–N(6)  | 2.1312(11) | F(20)–C(24) | 1.3508(14) |
| N(1)–C(a1)  | 1.3697(15) | C(21)–C(22) | 1.3912(17) |
| N(1)–C(a2)  | 1.3714(15) | C(21)–C(26) | 1.3936(17) |
| N(2)–C(a4)  | 1.3702(15) | C(22)–C(23) | 1.3875(17) |
| N(2)–C(a3)  | 1.3713(15) | C(22)–H(22) | 0.9500     |
| N(3)–C(a5)  | 1.3691(15) | C(23)–C(24) | 1.3758(18) |
| N(3)–C(a6)  | 1.3704(15) | C(23)–H(23) | 0.9500     |
| N(4)–C(a8)  | 1.3701(15) | C(24)–C(25) | 1.3754(19) |
| N(4)–C(a7)  | 1.3719(15) | C(25)–C(26) | 1.3888(18) |
| C(m1)–C(a3) | 1.3898(16) | C(25)–H(25) | 0.9500     |
| C(m1)–C(a2) | 1.3918(17) | C(26)–H(26) | 0.9500     |
| C(m1)–C(11) | 1.4898(16) | F(30)–C(34) | 1.3535(15) |
| C(m2)–C(a5) | 1.3906(16) | C(31)–C(32) | 1.3861(18) |
| C(m2)–C(a4) | 1.3918(16) | C(31)–C(36) | 1.3910(18) |
| C(m2)–C(21) | 1.4871(16) | C(32)–C(33) | 1.3905(18) |
| C(m3)–C(a7) | 1.3914(16) | C(32)–H(32) | 0.9500     |
| C(m3)–C(a6) | 1.3953(17) | C(33)–C(34) | 1.369(2)   |
| C(m3)–C(31) | 1.4924(16) | C(33)–H(33) | 0.9500     |
| C(m4)–C(a8) | 1.3895(17) | C(34)–C(35) | 1.371(2)   |
| C(m4)–C(a1) | 1.3896(17) | C(35)–C(36) | 1.3886(19) |
| C(m4)–C(41) | 1.4912(16) | C(35)–H(35) | 0.9500     |
| C(a1)–C(b1) | 1.4388(16) | C(36)–H(36) | 0.9500     |
| C(a2)–C(b2) | 1.4385(16) | F(40)–C(44) | 1.3590(14) |
| C(a3)–C(b3) | 1.4386(17) | C(41)–C(42) | 1.3848(18) |
| C(a4)–C(b4) | 1.4366(16) | C(41)–C(46) | 1.3871(19) |
| C(a5)–C(b5) | 1.4421(16) | C(42)–C(43) | 1.3867(18) |
| C(a6)–C(b6) | 1.4369(16) | C(42)–H(42) | 0.9500     |
| C(a7)–C(b7) | 1.4380(17) | C(43)–C(44) | 1.368(2)   |
| C(a8)–C(b8) | 1.4382(17) | C(43)–H(43) | 0.9500     |

**Table S9.** Continued

| bond        | length (Å) | bond        | length (Å) |
|-------------|------------|-------------|------------|
| C(b1)–C(b2) | 1.3504(18) | C(44)–C(45) | 1.367(2)   |
| C(b1)–H(b1) | 0.9500     | C(45)–C(46) | 1.388(2)   |
| C(b2)–H(b2) | 0.9500     | C(45)–H(45) | 0.9500     |
| C(b3)–C(b4) | 1.3535(17) | C(46)–H(46) | 0.9500     |
| C(b3)–H(b3) | 0.9500     | N(5)–O(1)   | 1.1808(14) |
| C(b4)–H(b4) | 0.9500     | N(6)–C(1)   | 1.3200(16) |
| C(b5)–C(b6) | 1.3521(17) | N(6)–C(3)   | 1.3726(16) |
| C(b5)–H(b5) | 0.9500     | N(7)–C(1)   | 1.3475(16) |
| C(b6)–H(b6) | 0.9500     | N(7)–C(2)   | 1.3667(17) |
| C(b7)–C(b8) | 1.3564(17) | N(7)–C(4)   | 1.4535(17) |
| C(b7)–H(b7) | 0.9500     | C(1)–H(1)   | 0.9500     |
| C(b8)–H(b8) | 0.9500     | C(2)–C(3)   | 1.3568(18) |
| F(10)–C(14) | 1.3572(15) | C(2)–H(2)   | 0.9500     |
| C(11)–C(16) | 1.3864(18) | C(3)–H(3)   | 0.9500     |
| C(11)–C(12) | 1.3889(17) | C(4)–H(4a)  | 0.9800     |
| C(12)–C(13) | 1.3882(17) | C(4)–H(4b)  | 0.9800     |
| C(12)–H(12) | 0.9500     | C(4)–H(4C)  | 0.9800     |
| C(13)–C(14) | 1.373(2)   |             |            |

<sup>a</sup>The estimated standard deviations of the least significant digits are given in parentheses.

**Table S10.** Bond Angles for *mono*-[Fe(TpFPP)(NO)(1-MeIm)]<sup>a</sup>

| angle             | degree     | angle             | degree     |
|-------------------|------------|-------------------|------------|
| N(5)–Fe(1)–N(1)   | 89.07(4)   | C(13)–C(12)–H(12) | 119.5      |
| N(5)–Fe(1)–N(2)   | 86.93(5)   | C(11)–C(12)–H(12) | 119.5      |
| N(1)–Fe(1)–N(2)   | 89.99(4)   | C(14)–C(13)–C(12) | 118.15(12) |
| N(5)–Fe(1)–N(3)   | 95.70(5)   | C(14)–C(13)–H(13) | 120.9      |
| N(1)–Fe(1)–N(3)   | 175.22(4)  | C(12)–C(13)–H(13) | 120.9      |
| N(2)–Fe(1)–N(3)   | 90.59(4)   | F(10)–C(14)–C(15) | 118.49(13) |
| N(5)–Fe(1)–N(4)   | 95.79(5)   | F(10)–C(14)–C(13) | 118.79(13) |
| N(1)–Fe(1)–N(4)   | 90.12(4)   | C(15)–C(14)–C(13) | 122.72(12) |
| N(2)–Fe(1)–N(4)   | 177.27(4)  | C(14)–C(15)–C(16) | 118.34(14) |
| N(3)–Fe(1)–N(4)   | 89.08(4)   | C(14)–C(15)–H(15) | 120.8      |
| N(5)–Fe(1)–N(6)   | 175.08(4)  | C(16)–C(15)–H(15) | 120.8      |
| N(1)–Fe(1)–N(6)   | 88.20(4)   | C(11)–C(16)–C(15) | 120.89(13) |
| N(2)–Fe(1)–N(6)   | 88.98(4)   | C(11)–C(16)–H(16) | 119.6      |
| N(3)–Fe(1)–N(6)   | 87.07(4)   | C(15)–C(16)–H(16) | 119.6      |
| N(4)–Fe(1)–N(6)   | 88.30(4)   | C(22)–C(21)–C(26) | 118.74(11) |
| C(a1)–N(1)–C(a2)  | 105.88(9)  | C(22)–C(21)–C(m2) | 119.39(11) |
| C(a1)–N(1)–Fe(1)  | 127.05(8)  | C(26)–C(21)–C(m2) | 121.83(11) |
| C(a2)–N(1)–Fe(1)  | 127.07(8)  | C(23)–C(22)–C(21) | 121.19(11) |
| C(a4)–N(2)–C(a3)  | 105.91(10) | C(23)–C(22)–H(22) | 119.4      |
| C(a4)–N(2)–Fe(1)  | 126.43(8)  | C(21)–C(22)–H(22) | 119.4      |
| C(a3)–N(2)–Fe(1)  | 126.83(8)  | C(24)–C(23)–C(22) | 117.86(12) |
| C(a5)–N(3)–C(a6)  | 105.81(10) | C(24)–C(23)–H(23) | 121.1      |
| C(a5)–N(3)–Fe(1)  | 126.40(8)  | C(22)–C(23)–H(23) | 121.1      |
| C(a6)–N(3)–Fe(1)  | 127.56(8)  | F(20)–C(24)–C(25) | 119.04(11) |
| C(a8)–N(4)–C(a7)  | 105.68(10) | F(20)–C(24)–C(23) | 117.76(12) |
| C(a8)–N(4)–Fe(1)  | 126.64(8)  | C(25)–C(24)–C(23) | 123.20(12) |
| C(a7)–N(4)–Fe(1)  | 127.68(8)  | C(24)–C(25)–C(26) | 117.92(12) |
| C(a3)–C(m1)–C(a2) | 123.63(11) | C(24)–C(25)–H(25) | 121.0      |
| C(a3)–C(m1)–C(11) | 118.66(11) | C(26)–C(25)–H(25) | 121.0      |
| C(a2)–C(m1)–C(11) | 117.66(10) | C(25)–C(26)–C(21) | 121.02(12) |
| C(a5)–C(m2)–C(a4) | 123.89(11) | C(25)–C(26)–H(26) | 119.5      |
| C(a5)–C(m2)–C(21) | 117.74(10) | C(21)–C(26)–H(26) | 119.5      |
| C(a4)–C(m2)–C(21) | 118.34(10) | C(32)–C(31)–C(36) | 118.56(12) |
| C(a7)–C(m3)–C(a6) | 123.45(11) | C(32)–C(31)–C(m3) | 122.01(11) |

**Table S10.** Continued

| angle             | degree     | angle             | degree     |
|-------------------|------------|-------------------|------------|
| C(a7)–C(m3)–C(31) | 118.55(11) | C(36)–C(31)–C(m3) | 119.42(11) |
| C(a6)–C(m3)–C(31) | 117.80(11) | C(31)–C(32)–C(33) | 120.96(13) |
| C(a8)–C(m4)–C(a1) | 124.05(11) | C(31)–C(32)–H(32) | 119.5      |
| C(a8)–C(m4)–C(41) | 118.62(11) | C(33)–C(32)–H(32) | 119.5      |
| C(a1)–C(m4)–C(41) | 117.32(10) | C(34)–C(33)–C(32) | 118.41(13) |
| N(1)–C(a1)–C(m4)  | 126.27(11) | C(34)–C(33)–H(33) | 120.8      |
| N(1)–C(a1)–C(b1)  | 110.16(10) | C(32)–C(33)–H(33) | 120.8      |
| C(m4)–C(a1)–C(b1) | 123.55(11) | F(30)–C(34)–C(33) | 118.53(13) |
| N(1)–C(a2)–C(m1)  | 125.94(11) | F(30)–C(34)–C(35) | 118.73(13) |
| N(1)–C(a2)–C(b2)  | 110.13(10) | C(33)–C(34)–C(35) | 122.73(12) |
| C(m1)–C(a2)–C(b2) | 123.91(11) | C(34)–C(35)–C(36) | 118.12(13) |
| N(2)–C(a3)–C(m1)  | 125.53(11) | C(34)–C(35)–H(35) | 120.9      |
| N(2)–C(a3)–C(b3)  | 110.06(10) | C(36)–C(35)–H(35) | 120.9      |
| C(m1)–C(a3)–C(b3) | 124.40(11) | C(35)–C(36)–C(31) | 121.19(13) |
| N(2)–C(a4)–C(m2)  | 125.92(11) | C(35)–C(36)–H(36) | 119.4      |
| N(2)–C(a4)–C(b4)  | 110.27(10) | C(31)–C(36)–H(36) | 119.4      |
| C(m2)–C(a4)–C(b4) | 123.81(11) | C(42)–C(41)–C(46) | 118.73(12) |
| N(3)–C(a5)–C(m2)  | 126.01(11) | C(42)–C(41)–C(m4) | 119.55(11) |
| N(3)–C(a5)–C(b5)  | 110.29(10) | C(46)–C(41)–C(m4) | 121.68(12) |
| C(m2)–C(a5)–C(b5) | 123.70(11) | C(41)–C(42)–C(43) | 121.16(13) |
| N(3)–C(a6)–C(m3)  | 126.26(11) | C(41)–C(42)–H(42) | 119.4      |
| N(3)–C(a6)–C(b6)  | 110.24(10) | C(43)–C(42)–H(42) | 119.4      |
| C(m3)–C(a6)–C(b6) | 123.50(11) | C(44)–C(43)–C(42) | 117.95(13) |
| N(4)–C(a7)–C(m3)  | 125.46(11) | C(44)–C(43)–H(43) | 121.0      |
| N(4)–C(a7)–C(b7)  | 110.32(10) | C(42)–C(43)–H(43) | 121.0      |
| C(m3)–C(a7)–C(b7) | 123.98(11) | F(40)–C(44)–C(45) | 118.89(13) |
| N(4)–C(a8)–C(m4)  | 125.69(11) | F(40)–C(44)–C(43) | 117.98(13) |
| N(4)–C(a8)–C(b8)  | 110.46(10) | C(45)–C(44)–C(43) | 123.13(13) |
| C(m4)–C(a8)–C(b8) | 123.84(11) | C(44)–C(45)–C(46) | 118.11(14) |
| C(b2)–C(b1)–C(a1) | 106.92(11) | C(44)–C(45)–H(45) | 120.9      |
| C(b2)–C(b1)–H(b1) | 126.5      | C(46)–C(45)–H(45) | 120.9      |
| C(a1)–C(b1)–H(b1) | 126.5      | C(41)–C(46)–C(45) | 120.92(14) |
| C(b1)–C(b2)–C(a2) | 106.90(11) | C(41)–C(46)–H(46) | 119.5      |
| C(b1)–C(b2)–H(b2) | 126.5      | C(45)–C(46)–H(46) | 119.5      |

**Table S10.** Continued

| angle             | degree     | angle            | degree     |
|-------------------|------------|------------------|------------|
| C(a2)–C(b2)–H(b2) | 126.5      | O(1)–N(5)–Fe(1)  | 137.27(9)  |
| C(b4)–C(b3)–C(a3) | 106.93(11) | C(1)–N(6)–C(3)   | 105.46(11) |
| C(b4)–C(b3)–H(b3) | 126.5      | C(1)–N(6)–Fe(1)  | 130.05(8)  |
| C(a3)–C(b3)–H(b3) | 126.5      | C(3)–N(6)–Fe(1)  | 124.48(8)  |
| C(b3)–C(b4)–C(a4) | 106.82(11) | C(1)–N(7)–C(2)   | 107.13(11) |
| C(b3)–C(b4)–H(b4) | 126.6      | C(1)–N(7)–C(4)   | 127.85(12) |
| C(a4)–C(b4)–H(b4) | 126.6      | C(2)–N(7)–C(4)   | 125.01(11) |
| C(b6)–C(b5)–C(a5) | 106.60(11) | N(6)–C(1)–N(7)   | 111.39(11) |
| C(b6)–C(b5)–H(b5) | 126.7      | N(6)–C(1)–H(1)   | 124.3      |
| C(a5)–C(b5)–H(b5) | 126.7      | N(7)–C(1)–H(1)   | 124.3      |
| C(b5)–C(b6)–C(a6) | 107.04(11) | C(3)–C(2)–N(7)   | 106.24(11) |
| C(b5)–C(b6)–H(b6) | 126.5      | C(3)–C(2)–H(2)   | 126.9      |
| C(a6)–C(b6)–H(b6) | 126.5      | N(7)–C(2)–H(2)   | 126.9      |
| C(b8)–C(b7)–C(a7) | 106.83(11) | C(2)–C(3)–N(6)   | 109.78(12) |
| C(b8)–C(b7)–H(b7) | 126.6      | C(2)–C(3)–H(3)   | 125.1      |
| C(a7)–C(b7)–H(b7) | 126.6      | N(6)–C(3)–H(3)   | 125.1      |
| C(b7)–C(b8)–C(a8) | 106.66(11) | N(7)–C(4)–H(4a)  | 109.5      |
| C(b7)–C(b8)–H(b8) | 126.7      | N(7)–C(4)–H(4b)  | 109.5      |
| C(a8)–C(b8)–H(b8) | 126.7      | H(4a)–C(4)–H(4b) | 109.5      |
| C(16)–C(11)–C(12) | 118.89(12) | N(7)–C(4)–H(4C)  | 109.5      |
| C(16)–C(11)–C(m1) | 119.80(11) | H(4a)–C(4)–H(4C) | 109.5      |
| C(12)–C(11)–C(m1) | 121.27(11) | H(4b)–C(4)–H(4C) | 109.5      |
| C(13)–C(12)–C(11) | 121.01(12) |                  |            |

<sup>a</sup>The estimated standard deviations of the least significant digits are given in parentheses.

**Table S11.** Anisotropic Displacement Parameters ( $\text{\AA}^2$ ) for *mono*-[Fe(TpFPP)(NO)(1-MeIm)]<sup>a</sup>

| atom  | $U_{11}$  | $U_{22}$  | $U_{33}$  | $U_{23}$   | $U_{13}$   | $U_{12}$   |
|-------|-----------|-----------|-----------|------------|------------|------------|
| Fe(1) | 0.0112(1) | 0.0102(1) | 0.0100(1) | -0.0004(1) | 0.0016(1)  | 0.0001(1)  |
| N(1)  | 0.0136(4) | 0.0123(4) | 0.0112(4) | -0.0003(3) | 0.0017(3)  | 0.0003(3)  |
| N(2)  | 0.0126(4) | 0.0132(4) | 0.0109(4) | 0.0001(3)  | 0.0017(3)  | 0.0000(3)  |
| N(3)  | 0.0123(4) | 0.0138(4) | 0.0116(4) | 0.0000(3)  | 0.0021(3)  | 0.0003(3)  |
| N(4)  | 0.0130(4) | 0.0133(4) | 0.0117(4) | -0.0009(3) | 0.0019(3)  | 0.0003(3)  |
| C(M1) | 0.0135(5) | 0.0121(5) | 0.0132(5) | -0.0013(4) | 0.0008(4)  | 0.0002(4)  |
| C(M2) | 0.0142(5) | 0.0145(5) | 0.0116(5) | 0.0003(4)  | 0.0034(4)  | 0.0007(4)  |
| C(M3) | 0.0122(5) | 0.0132(5) | 0.0149(5) | -0.0002(4) | 0.0003(4)  | 0.0009(4)  |
| C(M4) | 0.0163(5) | 0.0137(5) | 0.0122(5) | -0.0010(4) | 0.0033(4)  | -0.0005(4) |
| C(A1) | 0.0159(5) | 0.0130(5) | 0.0116(5) | -0.0004(4) | 0.0022(4)  | -0.0004(4) |
| C(A2) | 0.0146(5) | 0.0124(5) | 0.0121(5) | -0.0005(4) | 0.0008(4)  | -0.0002(4) |
| C(A3) | 0.0122(5) | 0.0138(5) | 0.0139(5) | -0.0013(4) | 0.0014(4)  | -0.0001(4) |
| C(A4) | 0.0131(5) | 0.0137(5) | 0.0129(5) | -0.0001(4) | 0.0031(4)  | -0.0001(4) |
| C(A5) | 0.0142(5) | 0.0144(5) | 0.0112(5) | 0.0004(4)  | 0.0017(4)  | 0.0007(4)  |
| C(A6) | 0.0130(5) | 0.0143(5) | 0.0128(5) | 0.0005(4)  | 0.0006(4)  | 0.0005(4)  |
| C(A7) | 0.0125(5) | 0.0129(5) | 0.0139(5) | -0.0002(4) | 0.0024(4)  | 0.0009(4)  |
| C(A8) | 0.0146(5) | 0.0138(5) | 0.0132(5) | -0.0010(4) | 0.0038(4)  | 0.0005(4)  |
| C(B1) | 0.0187(5) | 0.0187(6) | 0.0115(5) | 0.0008(4)  | 0.0015(4)  | -0.0013(4) |
| C(B2) | 0.0162(5) | 0.0184(6) | 0.0126(5) | 0.0006(4)  | -0.0003(4) | -0.0010(4) |
| C(B3) | 0.0125(5) | 0.0197(6) | 0.0163(5) | -0.0022(4) | 0.0025(4)  | -0.0009(4) |
| C(B4) | 0.0141(5) | 0.0189(6) | 0.0154(5) | -0.0005(4) | 0.0044(4)  | -0.0008(4) |
| C(B5) | 0.0161(5) | 0.0209(6) | 0.0121(5) | -0.0004(4) | 0.0014(4)  | 0.0010(4)  |
| C(B6) | 0.0153(5) | 0.0210(6) | 0.0126(5) | -0.0001(4) | -0.0003(4) | 0.0011(4)  |
| C(B7) | 0.0135(5) | 0.0206(6) | 0.0162(5) | 0.0002(4)  | 0.0035(4)  | 0.0019(4)  |
| C(B8) | 0.0150(5) | 0.0199(6) | 0.0153(5) | -0.0005(4) | 0.0049(4)  | 0.0018(4)  |
| F(10) | 0.0173(4) | 0.0433(6) | 0.0353(5) | -0.0046(4) | -0.0093(4) | 0.0052(4)  |
| C(11) | 0.0143(5) | 0.0155(5) | 0.0136(5) | -0.0007(4) | 0.0004(4)  | 0.0002(4)  |
| C(12) | 0.0164(5) | 0.0144(5) | 0.0193(5) | -0.0013(4) | 0.0006(4)  | 0.0002(4)  |
| C(13) | 0.0185(6) | 0.0188(6) | 0.0193(6) | -0.0014(4) | -0.0009(4) | -0.0034(4) |
| C(14) | 0.0147(5) | 0.0278(7) | 0.0225(6) | -0.0013(5) | -0.0032(4) | 0.0021(5)  |
| C(15) | 0.0236(7) | 0.0316(8) | 0.0439(9) | -0.0150(7) | -0.0105(6) | 0.0133(6)  |
| C(16) | 0.0231(7) | 0.0241(7) | 0.0350(8) | -0.0136(6) | -0.0086(6) | 0.0078(5)  |
| F(20) | 0.0228(4) | 0.0334(5) | 0.0126(3) | 0.0003(3)  | 0.0057(3)  | 0.0031(3)  |
| C(21) | 0.0137(5) | 0.0164(5) | 0.0119(5) | 0.0000(4)  | 0.0031(4)  | -0.0003(4) |

**Table S11.** Continued

| atom  | $U_{11}$   | $U_{22}$  | $U_{33}$  | $U_{23}$   | $U_{13}$   | $U_{12}$   |
|-------|------------|-----------|-----------|------------|------------|------------|
| C(22) | 0.0172(5)  | 0.0165(5) | 0.0141(5) | 0.0018(4)  | 0.0037(4)  | 0.0010(4)  |
| C(23) | 0.0187(5)  | 0.0189(6) | 0.0158(5) | -0.0016(4) | 0.0046(4)  | 0.0019(4)  |
| C(24) | 0.0151(5)  | 0.0250(6) | 0.0112(5) | -0.0008(4) | 0.0030(4)  | -0.0006(4) |
| C(25) | 0.0248(6)  | 0.0230(6) | 0.0165(5) | 0.0062(5)  | 0.0061(5)  | 0.0047(5)  |
| C(26) | 0.0252(6)  | 0.0184(6) | 0.0172(5) | 0.0031(4)  | 0.0075(5)  | 0.0046(5)  |
| F(30) | 0.0146(4)  | 0.0432(6) | 0.0334(5) | -0.0051(4) | -0.0049(3) | -0.0027(4) |
| C(31) | 0.0118(5)  | 0.0157(5) | 0.0141(5) | 0.0002(4)  | 0.0016(4)  | -0.0002(4) |
| C(32) | 0.0173(6)  | 0.0164(6) | 0.0272(6) | -0.0020(5) | -0.0012(5) | 0.0010(4)  |
| C(33) | 0.0165(6)  | 0.0227(7) | 0.0322(7) | -0.0004(5) | -0.0028(5) | 0.0042(5)  |
| C(34) | 0.0126(5)  | 0.0292(7) | 0.0204(6) | -0.0015(5) | 0.0000(4)  | -0.0018(5) |
| C(35) | 0.0207(6)  | 0.0214(7) | 0.0362(8) | -0.0050(6) | -0.0021(5) | -0.0054(5) |
| C(36) | 0.0189(6)  | 0.0170(6) | 0.0345(7) | -0.0016(5) | -0.0022(5) | 0.0002(5)  |
| F(40) | 0.0277(4)  | 0.0495(6) | 0.0130(4) | 0.0018(4)  | 0.0077(3)  | -0.0034(4) |
| C(41) | 0.0156(5)  | 0.0190(6) | 0.0122(5) | -0.0001(4) | 0.0032(4)  | 0.0001(4)  |
| C(42) | 0.0258(6)  | 0.0205(6) | 0.0183(6) | -0.0017(5) | 0.0067(5)  | -0.0042(5) |
| C(43) | 0.0295(7)  | 0.0256(7) | 0.0197(6) | 0.0036(5)  | 0.0083(5)  | -0.0054(5) |
| C(44) | 0.0180(6)  | 0.0339(7) | 0.0122(5) | 0.0023(5)  | 0.0038(4)  | 0.0001(5)  |
| C(45) | 0.0559(11) | 0.0292(8) | 0.0232(7) | -0.0081(6) | 0.0213(7)  | -0.0042(7) |
| C(46) | 0.0571(11) | 0.0206(7) | 0.0242(7) | -0.0044(5) | 0.0216(7)  | -0.0051(7) |
| N(5)  | 0.0174(5)  | 0.0130(4) | 0.0146(4) | 0.0001(3)  | 0.0032(4)  | 0.0017(4)  |
| O(1)  | 0.0213(5)  | 0.0141(4) | 0.0319(5) | -0.0021(4) | 0.0021(4)  | -0.0023(3) |
| N(6)  | 0.0141(4)  | 0.0132(4) | 0.0136(4) | -0.0009(3) | 0.0024(3)  | -0.0006(3) |
| N(7)  | 0.0176(5)  | 0.0121(5) | 0.0225(5) | 0.0000(4)  | 0.0020(4)  | 0.0010(4)  |
| C(1)  | 0.0159(5)  | 0.0135(5) | 0.0226(6) | -0.0001(4) | 0.0002(4)  | -0.0005(4) |
| C(2)  | 0.0168(6)  | 0.0140(5) | 0.0304(7) | -0.0013(5) | -0.0005(5) | -0.0018(4) |
| C(3)  | 0.0156(5)  | 0.0149(6) | 0.0282(6) | -0.0009(5) | -0.0008(5) | -0.0009(4) |
| C(4)  | 0.0235(6)  | 0.0137(6) | 0.0388(8) | 0.0018(5)  | 0.0008(6)  | 0.0042(5)  |

<sup>a</sup>The estimated standard deviations of the least significant digits are given in parentheses. The anisotropic displacement factor exponent takes the form:  $-2 \pi [h^2 U_{11} + \dots + 2 h k a^* b^* U_{12}]$ .

**Table S12.** Hydrogen Atom Coordinates and Equivalent Isotropic Displacement Parameters ( $\text{\AA}^2$ ) for *mono*-[Fe(TpFPP)(NO)(1-MeIm)]<sup>a</sup>

| atom  | <i>x</i> | <i>y</i> | <i>z</i> | <i>U</i> (eq) |
|-------|----------|----------|----------|---------------|
| H(B1) | 0.6299   | 0.1314   | 0.3773   | 0.020         |
| H(B2) | 0.4670   | 0.1285   | 0.4225   | 0.019         |
| H(B3) | 0.3300   | 0.1055   | 0.7360   | 0.019         |
| H(B4) | 0.4025   | 0.1103   | 0.8981   | 0.019         |
| H(B5) | 0.7537   | 0.1354   | 1.0694   | 0.020         |
| H(B6) | 0.9159   | 0.1272   | 1.0228   | 0.020         |
| H(B7) | 1.0512   | 0.0948   | 0.7110   | 0.020         |
| H(B8) | 0.9791   | 0.1019   | 0.5487   | 0.020         |
| H(12) | 0.3654   | 0.0238   | 0.4964   | 0.020         |
| H(13) | 0.2117   | 0.0311   | 0.4142   | 0.023         |
| H(15) | 0.1762   | 0.2250   | 0.5255   | 0.041         |
| H(16) | 0.3301   | 0.2173   | 0.6072   | 0.034         |
| H(22) | 0.5129   | 0.2299   | 0.9905   | 0.019         |
| H(23) | 0.4625   | 0.2479   | 1.1328   | 0.021         |
| H(25) | 0.5511   | 0.0479   | 1.2084   | 0.025         |
| H(26) | 0.6022   | 0.0309   | 1.0660   | 0.024         |
| H(32) | 1.0500   | 0.0061   | 0.8859   | 0.025         |
| H(33) | 1.2059   | 0.0153   | 0.9630   | 0.029         |
| H(35) | 1.1736   | 0.2291   | 0.9822   | 0.032         |
| H(36) | 1.0187   | 0.2198   | 0.9031   | 0.029         |
| H(42) | 0.8478   | 0.2309   | 0.4458   | 0.025         |
| H(43) | 0.9030   | 0.2455   | 0.3051   | 0.029         |
| H(45) | 0.8513   | 0.0367   | 0.2491   | 0.042         |
| H(46) | 0.7968   | 0.0224   | 0.3903   | 0.039         |
| H(1)  | 0.5685   | 0.2629   | 0.6763   | 0.021         |
| H(2)  | 0.8079   | 0.3714   | 0.7595   | 0.025         |
| H(3)  | 0.8412   | 0.2419   | 0.7757   | 0.024         |
| H(4A) | 0.5738   | 0.4029   | 0.6347   | 0.038         |
| H(4B) | 0.6654   | 0.4452   | 0.6829   | 0.038         |
| H(4C) | 0.5842   | 0.4197   | 0.7412   | 0.038         |

<sup>a</sup>*U*(eq) is defined as one third of the trace of the orthogonalized  $\mathbf{U}_{ij}$  tensor the estimated standard deviations of the least significant digits are given in parentheses.



## Supporting Information

Figure 1. Comparison of the measured VDOS for powder samples of *mono*- and *tri*-[Fe(TpFPP)(1-MeIm)(NO)].

Figure 2. Illustration of the two crystalline forms of [Fe(TpFPP)(1-MeIm)(NO)]. The triclinic form is on the right.

Figure 3. Diagram showing overlap of molecules of the two polymorphs. The two molecules are centered on the four porphyrin nitrogen atoms. The triclinic species is drawn with thermal ellipsoids contoured at the 50% probability level as solid surfaces, whereas atoms of the monoclinic form are drawn with translucent spheres of arbitrary radius. Atoms of the NO and the porphyrin core are seen to be close to overlap, whereas the imidazole and peripheral *p*-fluorophenyl groups are not.

Figure 4. Predicted vibrational modes for *tri*-[Fe(TpFPP)(1-MeIm)(NO)] with frequencies of 147 cm<sup>-1</sup> and 166 cm<sup>-1</sup>.

Figure 5. Predicted vibrational mode for the complex in-plane and out-of-plane motion of the FeNO group and the imidazole leading to changes in the Fe-N<sub>Im</sub> bond at 322 cm<sup>-1</sup>. The experimentally observed values are 315 cm<sup>-1</sup> in *mono*-[Fe(TpFPP)(1-MeIm)(NO)] and 310 cm<sup>-1</sup> in *tri*-[Fe(TpFPP)(1-MeIm)(NO)].

Figure 6. Predicted vibrational modes for the in-plane motion of the FeNO group. The imidazole group is omitted for clarity. The experimentally observed values that correspond to the calculated values in parentheses for *mono*-[Fe(TpFPP)(1-MeIm)(NO)] are 219 (219), 343 (339) and 456/471 (463/466) cm<sup>-1</sup> and for *tri*-[Fe(TpFPP)(1-MeIm)(NO)] are 218 (219), 338 (339) and 457 (463/466) cm<sup>-1</sup>.

Figure 7. Formal diagram of the porphyrinato core of *mono*-[Fe(TpFPP)(1-MeIm)(NO)] (top) and *tri*-[Fe(TpFPP)(1-MeIm)(NO)] (bottom) both displaying the perpendicular displacements (in units of 0.01 Å) of the core atoms from the 24-atom mean plane. Positive displacements are toward the nitrosyl-coordinated face, while the imidazole ligand is displaced on the negative side of the porphyrin core. The orientation of the imidazole ligand with respect to the porphyrin core is also illustrated. The location of the 1-methyl group is represented by the large circle, while the location nitrosyl projection onto the porphyrin core is indicated by the small circle. Average bond distances (Å) and angles (degrees) are also displayed.

Table S1. Complete Crystallographic Details for *tri*-[Fe(TpFPP)(NO)(1-MeIm)].

Table S2. Atomic Coordinates and Equivalent Isotropic Displacement Parameters for *tri*-[Fe(TpFPP)(NO)(1-MeIm)].

Table S3. Bond Lengths for *tri*-[Fe(TpFPP)(NO)(1-MeIm)].

Table S4. Bond Angles for *tri*-[Fe(TpFPP)(NO)(1-MeIm)].

Table S5. Anisotropic Isotropic Displacement Parameters for *tri*-[Fe(TpFPP)(NO)(1-MeIm)].

Table S6. Hydrogen Coordinates and Isotropic Displacement Parameters for *tri*-[Fe(TpFPP)(NO)(1-MeIm)].

Table S7. Complete Crystallographic Details for *mono*-[Fe(TpFPP)(NO)(1-MeIm)].

Table S8. Atomic Coordinates and Equivalent Isotropic Displacement Parameters for *mono*-[Fe(TpFPP)(NO)(1-MeIm)].

Table S9. Bond Lengths for *mono*-[Fe(TpFPP)(NO)(1-MeIm)].

Table S10. Bond Angles for *mono*-[Fe(TpFPP)(NO)(1-MeIm)].

Table S11. Anisotropic Isotropic Displacement Parameters for *mono*-[Fe(TpFPP)(NO)(1-MeIm)].

Table S12. Hydrogen Coordinates and Isotropic Displacement Parameters for *mono*-[Fe(TpFPP)(NO)(1-MeIm)].
